# Supplementary material for: Analysis of Huntington’s Disease Modifiers Using the Hyperbolic Mapping of the Protein Interaction Network
Source: Int J Mol Sci. 2022 May 23;23(10):5853. doi: 10.3390/ijms23105853 (PMC9144261; doi:10.3390/ijms23105853)
Supplement: Supplementary file 1 [file ijms-23-05853-s001.zip]

Archive with 7 entries (7 files):
- Supplementary Figure S1.pdf
- Supplementary Figure S2.pdf
- Supplementary Legends.pdf
- Supplementary Table S1.csv
- Supplementary Table S2.csv
- Supplementary Table S3.csv
- Supplementary Table S4.csv
