# Supplementary material for: Analysis of Huntington’s Disease Modifiers Using the Hyperbolic Mapping of the Protein Interaction Network
Source: Int J Mol Sci. 2022 May 23;23(10):5853. doi: 10.3390/ijms23105853 (PMC9144261; doi:10.3390/ijms23105853)
Supplement: Supplementary file 1 [file ijms-23-05853-s001.zip › Supplementary Table S1.csv]

UniprotKB	Symbol	r	theta	cluster
ABCG1_HUMAN	ABCG1	18.51310789	0.647384623	1
ABCG4_HUMAN	ABCG4	18.85766278	0.647423179	1
GCP60_HUMAN	ACBD3	18.42816509	0.647372929	1
ACOX3_HUMAN	ACOX3	18.57333265	0.647502264	1
ACSL4_HUMAN	ACSL4	17.19996413	0.647386006	1
ADAM2_HUMAN	ADAM2	18.88643777	0.658181686	1
ATS1_HUMAN	ADAMTS1	18.2621376	0.595423257	1
ALG9_HUMAN	ALG9	18.14626038	0.630922842	1
PPBN_HUMAN	ALPG	18.95581327	0.5955748	1
PPB1_HUMAN	ALPP	18.70669513	0.595558717	1
APEL_HUMAN	APLN	18.90783123	0.568204401	1
AQP5_HUMAN	AQP5	18.91596863	0.568192889	1
ARHGA_HUMAN	ARHGEF10	17.87715662	0.648025021	1
ARMC8_HUMAN	ARMC8	16.44582678	0.588562293	1
ATG12_HUMAN	ATG12	17.21166219	0.567695457	1
AT1B4_HUMAN	ATP1B4	17.25614131	0.598350065	1
AT2B3_HUMAN	ATP2B3	17.42696533	0.597588385	1
AVPI1_HUMAN	AVPI1	18.91012284	0.568195608	1
B4GT4_HUMAN	B4GALT4	18.4935394	0.612565035	1
B9D1_HUMAN	B9D1	18.51064756	0.656180869	1
B9D2_HUMAN	B9D2	18.6660909	0.656223467	1
BCS1_HUMAN	BCS1L	18.57945379	0.612533169	1
BOK_HUMAN	BOK	18.73487482	0.618928864	1
BPHL_HUMAN	BPHL	18.52469104	0.598285428	1
BSCL2_HUMAN	BSCL2	17.23510039	0.633997688	1
BT2A2_HUMAN	BTN2A2	18.09958325	0.598343016	1
CA216_HUMAN	C1orf216	18.38198581	0.578797467	1
CT203_HUMAN	C20orf203	18.68629419	0.584276136	1
CD003_HUMAN	C4orf3	18.35543969	0.633836317	1
CH048_HUMAN	C8orf48	18.58736285	0.568119134	1
C2D1A_HUMAN	CC2D1A	18.61278676	0.609293731	1
CC120_HUMAN	CCDC120	18.06991659	0.57888053	1
CCPG1_HUMAN	CCPG1	17.76153792	0.631024167	1
CD226_HUMAN	CD226	18.37032825	0.647362346	1
CD320_HUMAN	CD320	18.79896726	0.609357566	1
CERS6_HUMAN	CERS6	17.98752621	0.598399163	1
CISD2_HUMAN	CISD2	18.23329659	0.624255606	1
CKAP4_HUMAN	CKAP4	16.46057813	0.615026676	1
CLD11_HUMAN	CLDN11	18.9206058	0.609294261	1
CLDN1_HUMAN	CLDND1	17.57477845	0.612512092	1
CLC1A_HUMAN	CLEC1A	18.81290351	0.631050382	1
CLGN_HUMAN	CLGN	18.41837435	0.658199667	1
CLIP4_HUMAN	CLIP4	18.7987655	0.574736223	1
KCY_HUMAN	CMPK1	18.89760094	0.598231643	1
CNNM1_HUMAN	CNNM1	18.04841344	0.635902647	1
CNRP1_HUMAN	CNRIP1	18.05459835	0.584241119	1
CO6A1_HUMAN	COL6A1	18.14376589	0.598228806	1
CR1_HUMAN	CR1	18.90525919	0.686331645	1
CRX_HUMAN	CRX	17.78760645	0.568860886	1
PPGB_HUMAN	CTSA	17.99445294	0.588088453	1
DDX4_HUMAN	DDX4	18.86891772	0.588494811	1
DHRS2_HUMAN	DHRS2	18.38906811	0.612470206	1
DKK1_HUMAN	DKK1	17.81642163	0.565533525	1
DYH11_HUMAN	DNAH11	18.77666147	0.623440227	1
DNJB5_HUMAN	DNAJB5	17.8535219	0.648022239	1
D19L2_HUMAN	DPY19L2	18.82312245	0.598276427	1
DTWD1_HUMAN	DTWD1	18.84076555	0.600269976	1
EFHC2_HUMAN	EFHC2	17.86970965	0.588069414	1
ENTP1_HUMAN	ENTPD1	18.86901263	0.588495602	1
ENTP4_HUMAN	ENTPD4	18.84280638	0.63391154	1
ENTP7_HUMAN	ENTPD7	18.6640509	0.598357524	1
ERMP1_HUMAN	ERMP1	18.08447006	0.633804092	1
EXOG_HUMAN	EXOG	18.71573163	0.647344963	1
FA9_HUMAN	F9	18.72124914	0.596274503	1
FADS1_HUMAN	FADS1	18.17230481	0.633873256	1
F124B_HUMAN	FAM124B	18.27350625	0.568142177	1
F135B_HUMAN	FAM135B	18.77676431	0.623424052	1
FAKD3_HUMAN	FASTKD3	18.64575667	0.600209163	1
FBF1_HUMAN	FBF1	17.5370012	0.578974697	1
FCGRN_HUMAN	FCGRT	18.30865385	0.59836434	1
FIZ1_HUMAN	FIZ1	18.89472749	0.568828485	1
FOXQ1_HUMAN	FOXQ1	14.0247786	0.644926544	1
FZD9_HUMAN	FZD9	18.91851684	0.568143574	1
GBRE_HUMAN	GABRE	16.95155764	0.633870741	1
GLT10_HUMAN	GALNT10	18.80630736	0.615119171	1
GAS6_HUMAN	GAS6	17.99241999	0.598309291	1
GBF1_HUMAN	GBF1	17.09917677	0.602839297	1
GBP3_HUMAN	GBP3	18.82913189	0.617308974	1
GCC1_HUMAN	GCC1	17.30007856	0.579027419	1
GCM2_HUMAN	GCM2	18.47256051	0.568870483	1
GDNF_HUMAN	GDNF	18.20591212	0.588519166	1
GRPL2_HUMAN	GLIPR1L2	18.22268745	0.588440209	1
GLRA2_HUMAN	GLRA2	17.74475037	0.635981508	1
GOGA7_HUMAN	GOLGA7	18.55139804	0.612514338	1
GP1BB_HUMAN	GP1BB	17.73027283	0.634948193	1
GPIX_HUMAN	GP9	18.54235433	0.634994354	1
GPAA1_HUMAN	GPAA1	17.97168317	0.595516526	1
GPR84_HUMAN	GPR84	18.84610292	0.598440346	1
KGUA_HUMAN	GUK1	18.39939623	0.598296854	1
HACL1_HUMAN	HACL1	18.68116481	0.587011446	1
DPB1_HUMAN	HLA-DPB1	17.97002455	0.58869182	1
HEM3_HUMAN	HMBS	18.70909727	0.633862207	1
H1BP3_HUMAN	HS1BP3	18.84193218	0.630377545	1
5HT3A_HUMAN	HTR3A	18.39165885	0.656357422	1
5HT3B_HUMAN	HTR3B	18.81240512	0.656398045	1
5HT3C_HUMAN	HTR3C	15.8938117	0.656343696	1
5HT3D_HUMAN	HTR3D	18.81340168	0.656386896	1
5HT3E_HUMAN	HTR3E	18.48879297	0.656333422	1
HTRA2_HUMAN	HTRA2	17.14004567	0.589641192	1
IPO7_HUMAN	IPO7	16.2660345	0.669233499	1
IQUB_HUMAN	IQUB	18.90718876	0.56819877	1
ITPR2_HUMAN	ITPR2	17.86016136	0.619021537	1
JKIP2_HUMAN	JAKMIP2	18.65299481	0.574700711	1
KCNKG_HUMAN	KCNK16	17.76352611	0.630962393	1
KCNQ3_HUMAN	KCNQ3	18.5337472	0.633953464	1
KCNQ5_HUMAN	KCNQ5	18.28112889	0.633901304	1
SKT_HUMAN	KIAA1217	18.11578038	0.578989378	1
K1586_HUMAN	KIAA1586	18.84173783	0.600272271	1
K1C15_HUMAN	KRT15	16.30024075	0.575694393	1
K2C6B_HUMAN	KRT6B	18.45745402	0.575744082	1
LAP4B_HUMAN	LAPTM4B	18.01996329	0.656208215	1
MAN1_HUMAN	LEMD3	17.440529	0.624821407	1
LMAN1_HUMAN	LMAN1	18.36224454	0.658156421	1
LMBR1_HUMAN	LMBR1	17.79149046	0.615630846	1
LMF2_HUMAN	LMF2	18.60684103	0.658128508	1
LNP_HUMAN	LNPK	17.65937463	0.614005491	1
LPAR1_HUMAN	LPAR1	15.45829666	0.61556221	1
LRP10_HUMAN	LRP10	18.17803242	0.656224629	1
LRP12_HUMAN	LRP12	17.87693166	0.635905576	1
LRRN4_HUMAN	LRRN4	18.90728057	0.568201084	1
LT4R2_HUMAN	LTB4R2	18.86796817	0.588430827	1
LYPD3_HUMAN	LYPD3	14.89307006	0.615090164	1
MAEA_HUMAN	MAEA	17.04108054	0.588549311	1
MAGT1_HUMAN	MAGT1	18.235769	0.658119482	1
MA1A1_HUMAN	MAN1A1	18.60218192	0.61246948	1
MA1A2_HUMAN	MAN1A2	18.53628541	0.612506304	1
MP3B2_HUMAN	MAP1LC3B2	18.38676032	0.60935853	1
M4K4_HUMAN	MAP4K4	17.65173722	0.617341807	1
MARH6_HUMAN	MARCHF6	18.09307723	0.636016096	1
MCFD2_HUMAN	MCFD2	18.89574793	0.658153077	1
MCHR1_HUMAN	MCHR1	18.94458202	0.586960766	1
MDFI_HUMAN	MDFI	13.74231494	0.568169661	1
MERTK_HUMAN	MERTK	18.89991302	0.598341628	1
MFSD3_HUMAN	MFSD3	18.90737236	0.568181931	1
MICU1_HUMAN	MICU1	18.43358397	0.647441695	1
EFHA1_HUMAN,MICU2_HUMAN	MICU2	17.97499325	0.647472447	1
MKLN1_HUMAN	MKLN1	16.51261086	0.588794086	1
MKS1_HUMAN	MKS1	18.25487346	0.656214291	1
MMP7_HUMAN	MMP7	17.13447943	0.59142552	1
NAB2_HUMAN	NAB2	18.6067218	0.587000099	1
NEK4_HUMAN	NEK4	16.88473285	0.600340235	1
NEUR1_HUMAN	NEU1	18.42439854	0.588064704	1
NOC4L_HUMAN	NOC4L	17.52758834	0.577648046	1
NRG1_HUMAN	NRG1	16.08427225	0.624262523	1
NRL_HUMAN	NRL	18.5746821	0.568812036	1
NGBR_HUMAN	NUS1	18.47456871	0.65809871	1
OPRX_HUMAN	OPRL1	18.64206262	0.59837217	1
OR2S1_HUMAN	OR2S2	18.82025445	0.631005958	1
PANX1_HUMAN	PANX1	18.49143229	0.633880139	1
PGRC2_HUMAN	PGRMC2	18.63289178	0.5877081	1
PHTF2_HUMAN	PHTF2	18.80520432	0.615074703	1
P4K2A_HUMAN	PI4K2A	18.15016939	0.656249759	1
GPI8_HUMAN	PIGK	18.12106846	0.59554763	1
PIGN_HUMAN	PIGN	18.81230542	0.598377875	1
PIGO_HUMAN	PIGO	18.39839617	0.65632507	1
PIGT_HUMAN	PIGT	18.21063394	0.595461188	1
PG12B_HUMAN	PLA2G12B	18.81569048	0.630999304	1
PLAP_HUMAN	PLAA	18.24462592	0.615119676	1
PMFBP_HUMAN	PMFBP1	18.83148767	0.58881358	1
PNOC_HUMAN	PNOC	18.88175426	0.598373075	1
PLPL4_HUMAN	PNPLA4	18.82618036	0.597610001	1
POMT1_HUMAN	POMT1	18.28728527	0.62424383	1
PREB_HUMAN	PREB	18.82558914	0.632971663	1
PRG2_HUMAN	PRG2	16.10547996	0.58870525	1
PRP31_HUMAN	PRPF31	14.59511649	0.574746225	1
TSP50_HUMAN	PRSS50	17.69787061	0.595467186	1
RAN_HUMAN	RAN	15.24614577	0.668832848	1
RBP10_HUMAN	RANBP10	17.09207331	0.588420876	1
RANB9_HUMAN	RANBP9	15.21920488	0.588461406	1
RAX2_HUMAN	RAX2	18.93852302	0.568845895	1
RBM18_HUMAN	RBM18	18.21550404	0.584222118	1
RDH14_HUMAN	RDH14	18.65984616	0.609352004	1
RMD5A_HUMAN	RMND5A	16.8979905	0.588517533	1
RMD5B_HUMAN	RMND5B	17.5890283	0.587660928	1
R10B1_HUMAN	RSPH10B	18.83168377	0.588788434	1
RTBDN_HUMAN	RTBDN	18.05671676	0.598256549	1
RTN1_HUMAN	RTN1	18.59521786	0.656352845	1
RTN2_HUMAN	RTN2	18.0261052	0.598430445	1
SC11C_HUMAN	SEC11C	18.59244453	0.595351179	1
SC23A_HUMAN	SEC23A	17.4847245	0.632654343	1
SC24D_HUMAN	SEC24D	18.62587736	0.632641646	1
SELN_HUMAN	SELENON	18.28065395	0.588684202	1
SEM4C_HUMAN	SEMA4C	18.53260318	0.600215205	1
ANT3_HUMAN	SERPINC1	18.14945965	0.596279195	1
SETD2_HUMAN	SETD2	17.92258391	0.64799777	1
SETD3_HUMAN	SETD3	18.65127557	0.598261131	1
SETD5_HUMAN	SETD5	18.20354391	0.587698273	1
SFRP2_HUMAN	SFRP2	18.45786126	0.588768266	1
SIG12_HUMAN	SIGLEC12	18.82005639	0.632928391	1
SI1L2_HUMAN	SIPA1L2	18.21012896	0.588725314	1
SCMC3_HUMAN	SLC25A23	18.78944606	0.624254978	1
SAMC_HUMAN	SLC25A26	18.84183501	0.600198024	1
ADT4_HUMAN	SLC25A31	18.77696997	0.623483682	1
S35B2_HUMAN	SLC35B2	18.26743561	0.634053849	1
S39A3_HUMAN	SLC39A3	18.67443972	0.633948877	1
S41A1_HUMAN	SLC41A1	18.80620713	0.615116731	1
S47A1_HUMAN	SLC47A1	18.03201789	0.633901203	1
CTR3_HUMAN	SLC7A3	18.6159847	0.598364897	1
SL9A1_HUMAN	SLC9A1	17.40851509	0.616262278	1
SL9A9_HUMAN	SLC9A9	18.77686715	0.623407574	1
SACA1_HUMAN	SPACA1	15.89001612	0.600236779	1
SPCS2_HUMAN	SPCS2	17.92020302	0.595377732	1
SPR2D_HUMAN	SPRR2D	18.83187983	0.588726123	1
ERG1_HUMAN	SQLE	18.60242131	0.636038123	1
SRP19_HUMAN	SRP19	18.00032822	0.669333555	1
SIA8E_HUMAN	ST8SIA5	18.82094738	0.5886722	1
STT3B_HUMAN	STT3B	18.19077334	0.658113166	1
SYMPK_HUMAN	SYMPK	16.18464201	0.644420829	1
SYNPR_HUMAN	SYNPR	18.92151286	0.613991376	1
TATD2_HUMAN	TATDN2	18.76591524	0.600214514	1
TB22A_HUMAN	TBC1D22A	17.32943031	0.647386789	1
TECT2_HUMAN	TCTN2	17.13919107	0.658145668	1
TDGF1_HUMAN	TDGF1	17.62487962	0.588918834	1
PAPD7_HUMAN	TENT4A	18.91906215	0.58851435	1
TESC_HUMAN,CHP3_HUMAN	TESC	18.75925188	0.616257614	1
THNS1_HUMAN	THNSL1	18.33190626	0.612469205	1
TIGIT_HUMAN	TIGIT	18.54751294	0.647341092	1
KITM_HUMAN	TK2	18.91987963	0.565502439	1
TMED3_HUMAN	TMED3	17.86744343	0.630394874	1
TMED4_HUMAN	TMED4	18.2166765	0.630395328	1
TM107_HUMAN	TMEM107	18.81936293	0.656208418	1
TM164_HUMAN	TMEM164	18.4951172	0.624226263	1
TM186_HUMAN	TMEM186	18.00838309	0.656279434	1
TMM19_HUMAN	TMEM19	18.91824409	0.634011619	1
TM223_HUMAN	TMEM223	18.5473874	0.656336467	1
TM39B_HUMAN	TMEM39B	18.620117	0.6242789	1
TM59L_HUMAN	TMEM59L	18.52020034	0.598311591	1
MKS3_HUMAN	TMEM67	18.40153629	0.598377684	1
TM87A_HUMAN	TMEM87A	18.32095058	0.636040983	1
TMPPE_HUMAN	TMPPE	18.09009073	0.633926768	1
TMTC4_HUMAN	TMTC4	18.46799556	0.598376309	1
TNPO1_HUMAN	TNPO1	16.45903425	0.66949654	1
TSN3_HUMAN	TSPAN3	16.70559078	0.609317787	1
TTC19_HUMAN	TTC19	18.0571015	0.598238299	1
TBB1_HUMAN	TUBB1	17.14685962	0.59631501	1
TXD15_HUMAN	TXNDC15	17.12196445	0.598410584	1
UBE2H_HUMAN	UBE2H	18.41963785	0.588581539	1
CEGT_HUMAN	UGCG	18.21617416	0.656316854	1
UD3A2_HUMAN	UGT3A2	18.74823545	0.656387448	1
USH1C_HUMAN	USH1C	17.45458443	0.596241628	1
USH1G_HUMAN	USH1G	18.85689573	0.596281602	1
USH2A_HUMAN	USH2A	18.85679981	0.59628291	1
USBP1_HUMAN	USHBP1	16.3334584	0.578811893	1
UTP11_HUMAN	UTP11	18.53501701	0.612498692	1
UT14A_HUMAN	UTP14A	17.56714494	0.642232099	1
VWDE_HUMAN	VWDE	18.64690862	0.588701768	1
WAC_HUMAN	WAC	17.7883357	0.623039721	1
SYWM_HUMAN	WARS2	18.91897128	0.588521597	1
WDR26_HUMAN	WDR26	16.32654454	0.588619329	1
WLS_HUMAN	WLS	18.28318468	0.656403536	1
YPEL5_HUMAN	YPEL5	17.11979285	0.588101007	1
ZC21C_HUMAN	ZC2HC1C	18.44076963	0.576009074	1
ZDH17_HUMAN	ZDHHC17	15.49282745	0.623451017	1
ZDHC7_HUMAN	ZDHHC7	18.40025273	0.636032378	1
ZDHC8_HUMAN	ZDHHC8	18.80460221	0.612499423	1
ZMY19_HUMAN	ZMYND19	17.41155456	0.58699784	1
ZN223_HUMAN	ZNF223	18.90709695	0.56820694	1
ZN440_HUMAN	ZNF440	18.56582044	0.568192378	1
ZN559_HUMAN	ZNF559	18.90755593	0.568153641	1
ZN589_HUMAN	ZNF589	18.6855151	0.588688269	1
ZN679_HUMAN	ZNF679	18.90746415	0.568180521	1
K0913_HUMAN,ZSWM8_HUMAN	ZSWIM8	18.39725218	0.588730596	1
2B32_HUMAN		18.55477118	0.58873261	1
A26L1_HUMAN		18.71486373	0.575726241	1
ABCB8_HUMAN		18.61633948	0.633867155	1
CBWD3_HUMAN		17.94294342	0.595379245	1
CJ035_HUMAN		17.99384343	0.633947371	1
CQ039_HUMAN		17.52789319	0.588411596	1
CR056_HUMAN		18.90773947	0.568148841	1
CT011_HUMAN		16.82226062	0.588701176	1
CTGE5_HUMAN		18.36047324	0.632941883	1
DEPP_HUMAN		18.31834851	0.575702392	1
DUS27_HUMAN		18.81648552	0.586399759	1
F134B_HUMAN		18.63882056	0.609324762	1
F27E3_HUMAN		18.48376149	0.568149522	1
GCNT2_HUMAN		18.04375281	0.588756089	1
GPHRA_HUMAN		18.6155115	0.598389637	1
GPHRB_HUMAN		18.46287202	0.615620334	1
GRM1A_HUMAN		17.93205843	0.631038008	1
H90B2_HUMAN		18.72070937	0.60033371	1
K0748_HUMAN		18.00778093	0.61895977	1
MIA3_HUMAN		17.35273875	0.63291118	1
N2DL2_HUMAN		18.45160105	0.59556934	1
PVRL2_HUMAN		18.07466198	0.64732649	1
RBY1F_HUMAN		18.75674313	0.574712025	1
RGPD5_HUMAN		17.72051883	0.669841999	1
TEFF1_HUMAN		17.77464608	0.612483057	1
TEX15_HUMAN		18.72168077	0.596261982	1
TM155_HUMAN		18.82410976	0.615623011	1
TMM8A_HUMAN		18.84397095	0.598311261	1
TMM97_HUMAN		18.55377276	0.598282086	1
U513_HUMAN		17.05496265	0.656258214	1
WBP5_HUMAN		18.46826459	0.588500385	1
AAAS_HUMAN	AAAS	18.22035359	0.708839965	2
MRP5_HUMAN	ABCC5	18.86967679	0.711856264	2
AGR3_HUMAN	AGR3	18.52289687	0.712640108	2
ELYS_HUMAN	AHCTF1	17.69365639	0.707754232	2
AIPL1_HUMAN	AIPL1	17.35415779	0.731672516	2
CO3_HUMAN	C3	17.40546756	0.686428529	2
CO5_HUMAN	C5	18.33960384	0.686433518	2
C5AR_HUMAN,C5AR1_HUMAN	C5AR1	18.60540947	0.686453345	2
CO6_HUMAN	C6	18.90341849	0.686426106	2
CO7_HUMAN	C7	18.58918032	0.686478637	2
CO8B_HUMAN	C8B	18.74157454	0.686452169	2
CCR2_HUMAN	CCR2	18.85131925	0.707916428	2
CFAB_HUMAN	CFB	18.33839978	0.686374248	2
FHR3_HUMAN	CFHR3	18.93297067	0.686464794	2
FHR4_HUMAN	CFHR4	18.93270132	0.686428109	2
FHR5_HUMAN	CFHR5	18.93279111	0.686407149	2
CFAI_HUMAN	CFI	18.55950184	0.686454656	2
PROP_HUMAN	CFP	18.62164807	0.686409541	2
CR2_HUMAN	CR2	17.99567098	0.686344113	2
CISY_HUMAN	CS	18.32978415	0.719363586	2
CTIF_HUMAN	CTIF	18.55389761	0.690484835	2
DD19A_HUMAN	DDX19A	17.55052932	0.690496698	2
DD19B_HUMAN	DDX19B	15.01054815	0.689223352	2
DDX25_HUMAN	DDX25	18.90828992	0.690459284	2
DEPD5_HUMAN	DEPDC5	17.76551088	0.732157786	2
FCER2_HUMAN	FCER2	18.90516723	0.686339513	2
FCGBP_HUMAN	FCGBP	18.85957817	0.68923268	2
FOXI1_HUMAN	FOXI1	17.85168355	0.697245055	2
FOXI2_HUMAN	FOXI2	15.51059326	0.698532121	2
LYAG_HUMAN	GAA	18.81380006	0.698572283	2
GLE1_HUMAN	GLE1	17.79946004	0.701971133	2
GSTA2_HUMAN	GSTA2	18.4525559	0.699494354	2
GSTA5_HUMAN	GSTA5	18.8423208	0.699559722	2
HUTH_HUMAN	HAL	17.77218426	0.689407834	2
HCST_HUMAN	HCST	18.87724007	0.719332926	2
DMB_HUMAN	HLA-DMB	18.17317447	0.688691371	2
DOA_HUMAN	HLA-DOA	18.82351748	0.688724795	2
DOB_HUMAN	HLA-DOB	18.82361621	0.688705103	2
DRA_HUMAN	HLA-DRA	16.81774643	0.68866019	2
DRB5_HUMAN	HLA-DRB5	18.5905113	0.688645714	2
HNRL1_HUMAN	HNRNPUL1	16.84842934	0.738261929	2
IFM1_HUMAN	IFITM1	18.61148133	0.686337966	2
I5P1_HUMAN	INPP5A	18.25746153	0.733038708	2
ITFG2_HUMAN	ITFG2	18.03064098	0.73304121	2
ITAX_HUMAN	ITGAX	18.77016374	0.686436666	2
KLK3_HUMAN	KLK3	18.1366088	0.690495197	2
KLK4_HUMAN	KLK4	18.82755868	0.688660492	2
LAMP1_HUMAN	LAMP1	17.9733394	0.732349719	2
LC7L3_HUMAN	LUC7L3	17.95077635	0.709091142	2
MICA_HUMAN	MICA	18.68082948	0.719295806	2
MI4GD_HUMAN	MIF4GD	18.12958746	0.690525178	2
MIO_HUMAN	MIOS	17.24371917	0.731545655	2
MPP9_HUMAN	MPHOSPH9	18.92675973	0.720775854	2
THTM_HUMAN	MPST	18.88989133	0.719325221	2
NAV1_HUMAN	NAV1	18.37427591	0.698735978	2
NDC1_HUMAN	NDC1	17.85191351	0.711468869	2
NFX1_HUMAN	NFX1	18.29466095	0.709559606	2
NPRL2_HUMAN	NPRL2	17.72924999	0.732137503	2
NPRL3_HUMAN	NPRL3	17.91019282	0.732148665	2
NUB1_HUMAN	NUB1	17.91607893	0.731706922	2
NU107_HUMAN	NUP107	15.15857205	0.708252118	2
NU133_HUMAN	NUP133	16.93124925	0.707678448	2
NU153_HUMAN	NUP153	14.70324586	0.72006067	2
NU160_HUMAN	NUP160	17.27566574	0.707668915	2
NU188_HUMAN	NUP188	17.47933185	0.711922116	2
NU205_HUMAN	NUP205	16.65069386	0.703850508	2
PO210_HUMAN	NUP210	17.97664473	0.708893166	2
NU214_HUMAN	NUP214	16.94043245	0.70950969	2
NUP37_HUMAN	NUP37	17.83079699	0.707974113	2
NUP43_HUMAN	NUP43	17.07818416	0.707849438	2
NUP54_HUMAN	NUP54	17.62851572	0.712734544	2
NUPL1_HUMAN,NUP58_HUMAN	NUP58	16.80923423	0.711863905	2
NUP62_HUMAN	NUP62	16.13657541	0.712689394	2
NUP85_HUMAN	NUP85	17.08716409	0.707907878	2
NUP88_HUMAN	NUP88	17.69944696	0.709371298	2
NUP93_HUMAN	NUP93	16.40121424	0.717663716	2
NUP98_HUMAN	NUP98	15.9648318	0.708560845	2
NUSAP_HUMAN	NUSAP1	17.8422156	0.69947482	2
NTF2_HUMAN	NUTF2	18.15494871	0.712727704	2
NXF1_HUMAN	NXF1	15.39183739	0.709067071	2
NXF3_HUMAN	NXF3	18.52430681	0.71271872	2
NXT1_HUMAN	NXT1	18.37062114	0.712708768	2
NXT2_HUMAN	NXT2	18.60588685	0.712658034	2
PASD1_HUMAN	PASD1	18.94706765	0.717365488	2
PDE5A_HUMAN	PDE5A	18.81718072	0.731679571	2
PLEK_HUMAN	PLEK	18.94298128	0.733051483	2
PUM1_HUMAN	PUM1	18.02729017	0.698523599	2
RAE1L_HUMAN	RAE1	14.81828432	0.719287464	2
RBP2_HUMAN	RANBP2	16.07459961	0.710921942	2
RANB3_HUMAN	RANBP3	18.00898493	0.698787152	2
RAGP1_HUMAN	RANGAP1	16.38485204	0.70610106	2
RCC1_HUMAN	RCC1	16.13247764	0.698759212	2
RCCD1_HUMAN	RCCD1	18.80440143	0.733041361	2
RGPD3_HUMAN	RGPD3	18.840571	0.698740319	2
RGPD8_HUMAN	RGPD8	18.14037183	0.70826697	2
SEH1_HUMAN	SEH1L	15.73417583	0.70893929	2
SENP1_HUMAN	SENP1	17.91542641	0.706075111	2
SENP2_HUMAN	SENP2	18.0400497	0.706122977	2
SESN1_HUMAN	SESN1	18.43718241	0.731668583	2
SESN2_HUMAN	SESN2	17.6432219	0.731274188	2
SESN3_HUMAN	SESN3	18.6239996	0.730433147	2
NSMA3_HUMAN	SMPD4	17.54513716	0.697245005	2
SUMO2_HUMAN	SUMO2	8.062266182	0.717370635	2
SZT2_HUMAN	SZT2	17.87850545	0.732182264	2
TM209_HUMAN	TMEM209	18.22018671	0.708924785	2
TPR_HUMAN	TPR	17.15363341	0.703901287	2
TREX2_HUMAN	TREX2	18.85948248	0.689257372	2
TTBK1_HUMAN	TTBK1	18.40096599	0.703563254	2
TTBK2_HUMAN	TTBK2	18.64966863	0.703536484	2
UBP11_HUMAN	USP11	14.282549	0.720797756	2
WDR24_HUMAN	WDR24	17.21126079	0.73171098	2
WDR59_HUMAN	WDR59	17.48598969	0.731201378	2
2B11_HUMAN		18.06132522	0.688690423	2
2B13_HUMAN		18.83823378	0.688695404	2
2B14_HUMAN		18.27318754	0.688729955	2
CL066_HUMAN		18.50479938	0.732900207	2
DSS1_HUMAN		14.52665412	0.755781972	2
F164A_HUMAN		18.81020966	0.731036275	2
GATL2_HUMAN		18.80047933	0.730985435	2
GATL3_HUMAN		18.29559913	0.731021505	2
N2DL1_HUMAN		18.94413759	0.719374499	2
N2DL4_HUMAN		18.94422649	0.719365422	2
NKG2D_HUMAN		17.94273098	0.719342125	2
NUP53_HUMAN		17.51193296	0.713963788	2
NUPL2_HUMAN		17.84175175	0.701940368	2
NXF2_HUMAN		18.29481736	0.712696998	2
OPSR_HUMAN		18.89584065	0.710900015	2
P121C_HUMAN		18.2766885	0.708827278	2
RET1G_HUMAN		18.94351511	0.719325703	2
RET1L_HUMAN		18.94404869	0.719377182	2
A1BG_HUMAN	A1BG	18.64610237	0.872906947	3
A1CF_HUMAN	A1CF	18.47336421	0.933802951	3
A2ML1_HUMAN	A2ML1	18.2508179	0.97795312	3
ABCA1_HUMAN	ABCA1	16.9979157	0.872542035	3
ABCAC_HUMAN	ABCA12	18.90000541	0.872554298	3
ABCA6_HUMAN	ABCA6	18.78138275	0.872787641	3
THIK_HUMAN	ACAA1	18.45432707	0.91284627	3
ACD10_HUMAN	ACAD10	18.39853909	0.929730493	3
ACAD8_HUMAN	ACAD8	18.17525896	0.841435267	3
ACES_HUMAN	ACHE	18.75904303	0.758929055	3
ACO11_HUMAN	ACOT11	18.68540376	0.842301958	3
PPAL_HUMAN	ACP2	17.81262108	1.056527832	3
ACY3_HUMAN	ACY3	18.62153037	1.03658706	3
ADCY9_HUMAN	ADCY9	18.15424192	1.075956648	3
BAI2_HUMAN,AGRB2_HUMAN	ADGRB2	18.9403976	0.767615015	3
LPHN3_HUMAN,AGRL3_HUMAN	ADGRL3	18.63254207	1.009845482	3
ADML_HUMAN	ADM	18.90028252	1.023315445	3
ADPGK_HUMAN	ADPGK	18.36974226	1.064307366	3
ASPG_HUMAN	AGA	18.17872474	0.874540687	3
AGFG1_HUMAN	AGFG1	18.37515133	1.076831667	3
AGGF1_HUMAN	AGGF1	17.67073642	1.043448108	3
PLCC_HUMAN	AGPAT3	18.4424215	1.0074656	3
AGRIN_HUMAN	AGRN	18.58055215	0.998327099	3
FETUA_HUMAN	AHSG	17.98977178	0.876632869	3
ALBU_HUMAN	ALB	13.1954939	0.876686225	3
AL1A2_HUMAN	ALDH1A2	18.93377832	0.870560676	3
ALDH2_HUMAN	ALDH2	17.18609581	0.870552514	3
AL3A1_HUMAN	ALDH3A1	18.74242252	0.980777416	3
MMSA_HUMAN	ALDH6A1	18.58724159	0.870992348	3
AL8A1_HUMAN	ALDH8A1	18.67948722	0.871028313	3
AMPD3_HUMAN	AMPD3	18.78353169	0.880965772	3
ANKAR_HUMAN	ANKAR	18.86521004	0.959864338	3
ANR40_HUMAN	ANKRD40	18.14072957	1.083207037	3
ANKR9_HUMAN	ANKRD9	18.80168756	1.097760909	3
ANXA9_HUMAN	ANXA9	18.85938677	0.980159831	3
AP4B1_HUMAN	AP4B1	18.21784776	1.098614942	3
AP4M1_HUMAN	AP4M1	17.036883	1.097916201	3
AP4S1_HUMAN	AP4S1	17.76327778	1.098795615	3
AB1IP_HUMAN	APBB1IP	18.21382703	0.817829605	3
ACPH_HUMAN	APEH	18.95087443	1.026809322	3
MTNB_HUMAN	APIP	17.6310263	1.036341045	3
APOA1_HUMAN	APOA1	15.31085847	0.875093014	3
APOA2_HUMAN	APOA2	18.41767182	0.875437053	3
APOA4_HUMAN	APOA4	18.51839914	0.877846172	3
APOC1_HUMAN	APOC1	18.76684918	0.876807114	3
APOC2_HUMAN	APOC2	18.78363392	0.882374182	3
APOC3_HUMAN	APOC3	18.52251204	0.878605527	3
ASGR1_HUMAN	ASGR1	18.83852619	0.816632133	3
ASGR2_HUMAN	ASGR2	17.05634169	1.009974226	3
ACY2_HUMAN	ASPA	18.9499018	1.036550154	3
APRV1_HUMAN	ASPRV1	18.50805204	1.014291815	3
ATLA1_HUMAN	ATL1	18.85045151	1.02638942	3
ATM_HUMAN	ATM	14.44497835	0.899209305	3
ATMIN_HUMAN	ATMIN	18.91359736	0.899077685	3
AT131_HUMAN	ATP13A1	18.63335789	0.865369934	3
AT1A4_HUMAN	ATP1A4	18.66393746	0.929711613	3
AT2A3_HUMAN	ATP2A3	17.42196275	1.002566492	3
VPP1_HUMAN	ATP6V0A1	17.35486666	1.0226461	3
VATO_HUMAN	ATP6V0B	18.63370734	0.865680942	3
VATL_HUMAN	ATP6V0C	18.49380251	0.816687334	3
VA0D1_HUMAN	ATP6V0D1	16.9680461	1.023646598	3
VATA_HUMAN	ATP6V1A	17.2836098	1.024575346	3
VATB2_HUMAN	ATP6V1B2	17.20522282	1.023611635	3
VATD_HUMAN	ATP6V1D	17.55321594	1.024673941	3
ATR_HUMAN	ATR	15.60368074	0.903778555	3
ATRN_HUMAN	ATRN	18.71670723	0.776205047	3
AT7L1_HUMAN	ATXN7L1	18.65676811	0.883853271	3
B4GT1_HUMAN	B4GALT1	18.45718245	1.007774875	3
BARX1_HUMAN	BARX1	18.63184234	0.916584167	3
BBX_HUMAN	BBX	18.28980145	1.04308528	3
BCAM_HUMAN	BCAM	18.74886781	0.972480173	3
BCAS4_HUMAN	BCAS4	17.76724474	0.830611971	3
CHLE_HUMAN	BCHE	18.72146497	0.758836337	3
BET1_HUMAN	BET1	18.30400845	1.060403029	3
BET1L_HUMAN	BET1L	18.41387066	1.064624471	3
BICC1_HUMAN	BICC1	18.73934564	1.034563223	3
BLM_HUMAN	BLM	15.63890266	0.898062611	3
BL1S1_HUMAN	BLOC1S1	17.57272825	0.830877329	3
BL1S2_HUMAN	BLOC1S2	17.49040693	0.83077596	3
BL1S3_HUMAN	BLOC1S3	17.95834669	0.830735493	3
CNO_HUMAN,BL1S4_HUMAN	BLOC1S4	18.51336656	0.831366573	3
MUTED_HUMAN,BL1S5_HUMAN	BLOC1S5	17.69892175	0.83101861	3
PLDN_HUMAN,BL1S6_HUMAN	BLOC1S6	17.70833903	0.830670917	3
SEC20_HUMAN	BNIP1	17.78297707	1.057782074	3
BPNT1_HUMAN	BPNT1	18.86578124	0.958875395	3
BRAT1_HUMAN	BRAT1	18.08765848	0.899218929	3
BRCA2_HUMAN	BRCA2	15.59224358	0.758096357	3
BRCC3_HUMAN	BRCC3	16.73330396	0.887152775	3
BROX_HUMAN	BROX	18.61562982	1.030513381	3
BRSK2_HUMAN	BRSK2	18.91058062	0.993967957	3
BASI_HUMAN	BSG	14.3995406	0.960384116	3
BST2_HUMAN	BST2	18.39553405	1.024040685	3
BT3A1_HUMAN	BTN3A1	18.41302425	0.980201585	3
BT3A2_HUMAN	BTN3A2	18.48561776	0.980547024	3
BT3A3_HUMAN	BTN3A3	18.82450445	0.980566459	3
BTNL8_HUMAN	BTNL8	16.38649878	0.776181963	3
CO039_HUMAN	C15orf39	18.12850344	0.787909755	3
CQ080_HUMAN	C17orf80	18.55014622	0.775786518	3
CR032_HUMAN	C18orf32	18.78537044	0.864812455	3
CS025_HUMAN	C19orf25	17.94400505	0.930200295	3
CA094_HUMAN	C1orf94	17.38701074	1.073486173	3
EURL_HUMAN	C21orf91	18.91268403	0.796765736	3
CB072_HUMAN	C2orf72	18.83501232	0.867419646	3
CD046_HUMAN	C4orf46	18.89045039	1.004789061	3
CF226_HUMAN	C6orf226	18.73998291	0.912840321	3
CAH14_HUMAN	CA14	16.56732145	0.951262512	3
CAPS1_HUMAN	CADPS	18.63428954	0.991010699	3
CALCA_HUMAN	CALCA	18.90019016	1.023336666	3
CACO2_HUMAN	CALCOCO2	15.4073704	0.809728373	3
CALRL_HUMAN	CALCRL	18.2421725	1.023322934	3
CALL5_HUMAN	CALML5	17.4266325	0.98091806	3
KCC1A_HUMAN	CAMK1	17.88589584	0.970678038	3
KKCC2_HUMAN	CAMKK2	17.12845472	0.970376634	3
CMTA1_HUMAN	CAMTA1	18.7833272	0.877166055	3
CAND2_HUMAN	CAND2	17.46461184	0.865036306	3
CAPG_HUMAN	CAPG	18.44708894	0.987033969	3
CAN5_HUMAN	CAPN5	18.83530555	0.867477065	3
CAN7_HUMAN	CAPN7	18.65196358	1.026684302	3
CARD6_HUMAN	CARD6	18.4021063	0.787100412	3
CARD8_HUMAN	CARD8	16.3125908	0.787357246	3
AL2S8_HUMAN,CARTF_HUMAN	CARF	18.91250128	0.797890873	3
C2D1B_HUMAN	CC2D1B	18.86929732	1.023816314	3
CC103_HUMAN	CCDC103	18.81708143	1.046259172	3
CC115_HUMAN	CCDC115	18.3597344	1.000874986	3
CC116_HUMAN	CCDC116	18.2089498	1.035067148	3
CC122_HUMAN	CCDC122	18.81220571	0.826295087	3
CC136_HUMAN	CCDC136	18.02906535	0.802549958	3
CC172_HUMAN	CCDC172	18.55987449	0.793428996	3
K1407_HUMAN,CC191_HUMAN	CCDC191	18.90975649	0.809775875	3
CCD33_HUMAN	CCDC33	16.58476375	0.809352001	3
CC85B_HUMAN	CCDC85B	13.50617244	0.796869442	3
GRDN_HUMAN	CCDC88A	15.94688101	1.094637922	3
CCHCR_HUMAN	CCHCR1	17.34847108	1.069985809	3
F190A_HUMAN,CCSE1_HUMAN	CCSER1	18.88653125	1.089287017	3
F190B_HUMAN,CCSE2_HUMAN	CCSER2	18.54298467	1.054391922	3
CLC4K_HUMAN	CD207	18.79987475	0.978905385	3
PD1L1_HUMAN	CD274	16.43325604	0.922356782	3
CD47_HUMAN	CD47	17.80234442	1.007120182	3
CD68_HUMAN	CD68	17.80330427	0.936866502	3
CD81_HUMAN	CD81	15.62781232	0.867453711	3
CDR2_HUMAN	CDR2	17.6680414	1.004769928	3
CDR2L_HUMAN	CDR2L	18.63149231	1.004687397	3
CDX4_HUMAN	CDX4	18.86758813	0.850288036	3
CEL2B_HUMAN	CELA2B	17.74953598	0.892485856	3
CELR2_HUMAN	CELSR2	18.14803885	0.824583353	3
CEND_HUMAN	CEND1	18.76778237	0.866211339	3
CENPF_HUMAN	CENPF	17.49166588	0.844911102	3
CERS2_HUMAN	CERS2	17.71327833	0.816651366	3
CETN1_HUMAN	CETN1	18.62763498	0.99132783	3
CETN2_HUMAN	CETN2	17.14558508	0.905613478	3
CGRF1_HUMAN	CGRRF1	17.8173698	1.050773588	3
CHK1_HUMAN	CHEK1	15.81270369	0.897874642	3
CHK2_HUMAN	CHEK2	15.954095	0.907594206	3
CHKB_HUMAN	CHKB	18.78394056	0.876747411	3
RAE1_HUMAN	CHM	17.613053	1.015137438	3
CHM1A_HUMAN	CHMP1A	17.28172333	1.026891605	3
CHM1B_HUMAN	CHMP1B	17.86789703	1.02684288	3
CHM2A_HUMAN	CHMP2A	17.69576543	1.03216823	3
CHM4A_HUMAN	CHMP4A	18.1080784	1.030228558	3
CHM4B_HUMAN	CHMP4B	14.66341927	1.023817254	3
CHMP5_HUMAN	CHMP5	17.5875823	1.030575325	3
ACHA9_HUMAN	CHRNA9	15.88238717	0.927554704	3
CIP2A_HUMAN	CIP2A	17.73435515	0.923455678	3
CKAP5_HUMAN	CKAP5	16.1767692	0.94062127	3
CLCA2_HUMAN	CLCA2	18.78322494	0.878066691	3
CL12A_HUMAN	CLEC12A	16.9734901	1.058203131	3
CLC2L_HUMAN	CLEC2L	18.64621759	0.814123579	3
NEPR1_HUMAN	CNEP1R1	18.75810272	1.050386996	3
CNTF_HUMAN	CNTF	17.85879082	0.814016928	3
COG1_HUMAN	COG1	17.85466937	0.935288388	3
COG2_HUMAN	COG2	17.51963381	0.934904166	3
COG3_HUMAN	COG3	17.26690164	0.934971906	3
COG4_HUMAN	COG4	17.68810169	0.935049945	3
COG5_HUMAN	COG5	17.4064843	0.935000679	3
COG6_HUMAN	COG6	17.53518537	0.9348605	3
COG7_HUMAN	COG7	17.56979305	0.93509142	3
COG8_HUMAN	COG8	18.10106518	0.935044398	3
COL11_HUMAN	COLEC11	18.01318905	1.010580532	3
COL12_HUMAN	COLEC12	17.54843537	1.054144075	3
COLQ_HUMAN	COLQ	18.7014366	0.758809693	3
CORT_HUMAN	CORT	18.49393405	0.779506773	3
CERU_HUMAN	CP	18.52302511	0.875185378	3
CPLX1_HUMAN	CPLX1	18.44982567	1.065425498	3
RABP2_HUMAN	CRABP2	18.27605275	0.766194594	3
CRUM1_HUMAN	CRB1	18.38820323	0.814276732	3
CRIS3_HUMAN	CRISP3	18.78455358	0.872903654	3
CRLD2_HUMAN	CRISPLD2	18.86568606	0.960872659	3
CGAT1_HUMAN	CSGALNACT1	17.87129335	1.012102161	3
CYTC_HUMAN	CST3	18.55701444	0.87566625	3
CYTF_HUMAN	CST7	18.94342615	0.876207543	3
CYTB_HUMAN	CSTB	18.37208444	0.875961414	3
CNEP1_HUMAN	CTDNEP1	18.54499944	1.050389799	3
CGL_HUMAN	CTH	18.35112887	0.985727226	3
CTNL1_HUMAN	CTNNAL1	18.40296078	0.991794561	3
CATH_HUMAN	CTSH	18.1750854	0.876101621	3
CATL1_HUMAN	CTSL	17.6544707	0.876152374	3
CATO_HUMAN	CTSO	18.60074454	0.793659329	3
CATL2_HUMAN	CTSV	18.12415709	0.881826304	3
CP51A_HUMAN	CYP51A1	18.49314461	1.002689281	3
CYTM1_HUMAN	CYSTM1	18.78547251	0.864103287	3
CYTIP_HUMAN	CYTIP	18.10162042	0.886152669	3
DGLB_HUMAN	DAGLB	18.19640988	0.863593854	3
OXDA_HUMAN	DAO	18.8674931	0.850221725	3
DAZP1_HUMAN	DAZAP1	18.22651139	0.911851836	3
DCA13_HUMAN	DCAF13	18.47229248	1.087312474	3
DCR1A_HUMAN	DCLRE1A	18.59280665	0.900371843	3
DCR1C_HUMAN	DCLRE1C	17.03454439	0.850590445	3
DEFI6_HUMAN	DEF6	16.9530664	0.885253863	3
DEPD7_HUMAN	DEPDC7	18.444483	0.827136345	3
DGKG_HUMAN	DGKG	18.68228184	0.879458388	3
DHRS7_HUMAN	DHRS7	17.78590305	0.928345002	3
DRS7B_HUMAN	DHRS7B	18.49996848	0.88760965	3
DHX32_HUMAN	DHX32	18.59365115	0.991513548	3
DKKL1_HUMAN	DKKL1	18.85603218	1.060108251	3
DLX1_HUMAN	DLX1	18.74125639	0.916903005	3
DAAF3_HUMAN	DNAAF3	18.84358289	0.998062419	3
DYH14_HUMAN	DNAH14	18.50909095	0.867103616	3
DNJC1_HUMAN	DNAJC1	18.13911885	1.050168333	3
DJC16_HUMAN	DNAJC16	18.80198942	0.77617773	3
DJC18_HUMAN	DNAJC18	18.84309764	0.927515114	3
DNSL1_HUMAN	DNASE1L1	18.6050513	0.775958134	3
DOPP1_HUMAN	DOLPP1	18.35662604	1.035979263	3
ATBD4_HUMAN,DPH6_HUMAN	DPH6	18.66665692	0.850574215	3
DPPA2_HUMAN	DPPA2	18.06934583	0.926414638	3
DSG1_HUMAN	DSG1	17.26575355	1.08829728	3
DTD1_HUMAN	DTD1	18.86463857	0.959683496	3
DTBP1_HUMAN	DTNBP1	14.34253262	0.835920294	3
DTWD2_HUMAN	DTWD2	18.37893713	0.823630029	3
DYRK3_HUMAN	DYRK3	18.77727839	0.99793441	3
DZI1L_HUMAN	DZIP1L	18.91131268	0.99188822	3
SYEM_HUMAN	EARS2	18.95105119	0.960457379	3
EHD3_HUMAN	EHD3	18.45078199	1.01670715	3
EI24_HUMAN	EI24	18.58699902	0.952978425	3
EID2B_HUMAN	EID2B	18.42760786	0.817162725	3
EID3_HUMAN	EID3	17.40783856	0.817445558	3
ELF2_HUMAN	ELF2	18.07238664	0.837689493	3
ELMD2_HUMAN	ELMOD2	18.79573485	1.005261633	3
ELMD3_HUMAN	ELMOD3	18.82015543	1.014302976	3
ELOA2_HUMAN	ELOA2	17.85787622	0.987955625	3
ENPP6_HUMAN	ENPP6	16.57642447	1.045852611	3
ENTP2_HUMAN	ENTPD2	18.86492434	1.062599401	3
HYEP_HUMAN	EPHX1	18.0887817	1.001426813	3
ERP29_HUMAN	ERP29	18.44379624	0.865658186	3
ESYT1_HUMAN	ESYT1	17.88477913	1.043818417	3
ESYT2_HUMAN	ESYT2	18.12597007	1.043888047	3
ESYT3_HUMAN	ESYT3	18.67769509	1.043858952	3
F176C_HUMAN,EVA1C_HUMAN	EVA1C	16.77101304	1.04983996	3
EVPL_HUMAN	EVPL	18.15777155	0.98033783	3
EXOC1_HUMAN	EXOC1	16.22321695	1.054239692	3
EXOC2_HUMAN	EXOC2	17.35167332	0.952376395	3
EXOC3_HUMAN	EXOC3	17.25922598	0.952399281	3
EXOC4_HUMAN	EXOC4	16.33604041	0.960224677	3
EXOC5_HUMAN	EXOC5	16.74841626	0.9517115	3
EXOC6_HUMAN	EXOC6	17.466221	0.952377134	3
EXC6B_HUMAN	EXOC6B	17.84776728	0.95175594	3
EXOC7_HUMAN	EXOC7	16.66304989	0.951558186	3
EXOC8_HUMAN	EXOC8	17.17868545	0.952254524	3
EXT2_HUMAN	EXT2	17.60224684	0.814030781	3
EXTL3_HUMAN	EXTL3	18.53158532	0.947649774	3
F120C_HUMAN	FAM120C	18.50049172	1.080058355	3
F124A_HUMAN	FAM124A	18.59918534	0.987775383	3
F126B_HUMAN	FAM126B	18.91942555	1.069279189	3
F161A_HUMAN	FAM161A	17.72257919	0.991488078	3
F169A_HUMAN	FAM169A	18.78128032	0.880199658	3
F210B_HUMAN	FAM210B	18.55551942	1.003949725	3
F71E2_HUMAN	FAM71E2	18.78281582	0.877668318	3
FA83A_HUMAN	FAM83A	18.69493985	1.079920985	3
FA83C_HUMAN	FAM83C	18.77655862	0.875097906	3
FANCG_HUMAN	FANCG	16.56168355	0.766729885	3
FACR1_HUMAN	FAR1	18.41598397	0.943787744	3
FAT3_HUMAN	FAT3	18.6389365	0.825365067	3
FAT4_HUMAN	FAT4	18.30911736	0.825199654	3
FCSD2_HUMAN	FCHSD2	18.26245939	1.033980183	3
FEN1_HUMAN	FEN1	16.66434283	0.918938816	3
FIBA_HUMAN	FGA	17.26881257	0.870477458	3
FIBB_HUMAN	FGB	17.65910273	0.870394335	3
FIBG_HUMAN	FGG	18.0503498	0.870468393	3
FIGL1_HUMAN	FIGNL1	18.1475056	0.938562992	3
FKB10_HUMAN	FKBP10	18.59966532	1.020213831	3
FLNC_HUMAN	FLNC	16.29846558	0.970231429	3
FLRT3_HUMAN	FLRT3	18.75893859	1.00982113	3
FNDC5_HUMAN	FNDC5	18.94395978	1.046739902	3
FOSL2_HUMAN	FOSL2	15.69580891	0.994108379	3
FOXA1_HUMAN	FOXA1	16.15483675	0.916909301	3
FOXA3_HUMAN	FOXA3	15.84478276	0.916587989	3
FOXD2_HUMAN	FOXD2	18.64909417	1.050778466	3
FXR2_HUMAN	FXR2	14.95187702	0.809318293	3
FZD2_HUMAN	FZD2	18.64009531	1.011251305	3
GABR1_HUMAN	GABBR1	18.15300398	1.052527875	3
GABR2_HUMAN	GABBR2	18.23230613	1.052548063	3
GABP1_HUMAN	GABPB1	17.69655532	0.76762094	3
GALT2_HUMAN	GALNT2	18.01717873	1.098356913	3
GALT5_HUMAN	GALNT5	18.94662418	0.813944264	3
G3PT_HUMAN	GAPDHS	17.2433288	0.805823629	3
GAST_HUMAN	GAST	18.86206341	0.868349226	3
GLUC_HUMAN	GCG	18.50401737	1.101204146	3
GDIA_HUMAN	GDI1	16.21560483	1.01628016	3
GDPD1_HUMAN	GDPD1	16.63489395	0.875203656	3
GFAP_HUMAN	GFAP	17.08537371	0.929560618	3
GHDC_HUMAN	GHDC	17.9486646	1.003119395	3
GIP_HUMAN	GIP	18.78577866	1.101078331	3
GIPR_HUMAN	GIPR	18.63626679	1.101143245	3
CXG2_HUMAN	GJC2	18.92450108	0.877584744	3
GKAP1_HUMAN	GKAP1	17.98014625	0.81583926	3
GLP1R_HUMAN	GLP1R	16.02159078	0.865658906	3
GNAI2_HUMAN	GNAI2	15.4564502	1.113657218	3
GNPAT_HUMAN	GNPAT	18.03613876	1.045166613	3
GOGA2_HUMAN	GOLGA2	14.58727055	1.069093211	3
GOGA5_HUMAN	GOLGA5	17.49355173	1.009156957	3
GOGB1_HUMAN	GOLGB1	17.73689925	1.074200349	3
GORS1_HUMAN	GORASP1	17.6393555	1.068712013	3
GOSR1_HUMAN	GOSR1	17.04479886	1.06026927	3
GOSR2_HUMAN	GOSR2	18.1265134	1.062118132	3
GPAT1_HUMAN	GPAM	18.67387752	1.101856754	3
GPDM_HUMAN	GPD2	18.2519549	1.041721796	3
PHLD_HUMAN	GPLD1	18.75359948	0.877881306	3
GPR18_HUMAN	GPR18	17.81309684	0.980915667	3
GPR35_HUMAN	GPR35	18.53641217	1.037079636	3
GPC5B_HUMAN	GPRC5B	18.47990681	1.012102678	3
GPX8_HUMAN	GPX8	18.82183768	0.805801381	3
GRID1_HUMAN	GRID1	18.69162229	0.885165873	3
GRTP1_HUMAN	GRTP1	18.86063027	1.094468198	3
GLYG_HUMAN	GYG1	17.93120033	0.852176542	3
GLYG2_HUMAN	GYG2	18.54876764	0.852179851	3
GYS1_HUMAN	GYS1	17.43888344	0.852105118	3
H10_HUMAN	H1-0	18.5609917	0.762399231	3
HACD1_HUMAN	HACD1	18.73466149	0.910236472	3
HCDH_HUMAN	HADH	18.70352098	1.019920389	3
HBB_HUMAN	HBB	17.21526855	0.87399259	3
HBD_HUMAN	HBD	18.8049033	0.875487009	3
HBE_HUMAN	HBE1	18.675114	0.87437463	3
HBG2_HUMAN	HBG2	18.67500165	0.874889156	3
HBAZ_HUMAN	HBZ	18.675451	0.873662877	3
HELQ_HUMAN	HELQ	17.9639919	0.761784311	3
HPHL1_HUMAN	HEPHL1	17.66561047	1.036804241	3
HFE_HUMAN	HFE	18.62317711	0.868124047	3
HGFA_HUMAN	HGFAC	18.60648331	1.033184092	3
HOMEZ_HUMAN	HOMEZ	18.59882523	0.885269481	3
HXC9_HUMAN	HOXC9	18.39753828	1.101990002	3
HXD10_HUMAN	HOXD10	18.63242548	0.979058344	3
HPT_HUMAN	HP	17.81713283	0.874139426	3
HEPS_HUMAN	HPN	18.78506419	0.866413845	3
HEMO_HUMAN	HPX	18.4692057	0.876908238	3
HRG_HUMAN	HRG	18.72222007	0.870138817	3
HUS1_HUMAN	HUS1	17.03220101	0.919202334	3
HUS1B_HUMAN	HUS1B	18.50896114	0.919467161	3
AGPD1_HUMAN,HYKK_HUMAN	HYKK	18.7974532	0.800014196	3
HYLS1_HUMAN	HYLS1	18.77614712	1.101649795	3
IAPP_HUMAN	IAPP	18.77625001	1.10216016	3
ICA69_HUMAN	ICA1	18.28002039	0.813761857	3
IDE_HUMAN	IDE	17.37349405	1.101697293	3
IGDC4_HUMAN	IGDCC4	18.78383835	0.881469988	3
IGF2_HUMAN	IGF2	17.71042133	1.101699775	3
IBP6_HUMAN	IGFBP6	18.95449245	1.101746322	3
IBP7_HUMAN	IGFBP7	18.45881092	1.101475227	3
IGSF3_HUMAN	IGSF3	18.65379624	0.824358181	3
IGSF8_HUMAN	IGSF8	17.91215821	0.867192638	3
IKIP_HUMAN	IKBIP	18.05344121	1.048303307	3
IL19_HUMAN	IL19	18.65047238	0.928218016	3
IL20_HUMAN	IL20	18.60158323	0.928195016	3
I20RA_HUMAN	IL20RA	18.6005048	0.928192009	3
I20RB_HUMAN	IL20RB	17.75680213	0.928223442	3
IL24_HUMAN	IL24	18.42746851	0.907579823	3
IMP1L_HUMAN	IMMP1L	18.84697396	1.007191719	3
IMDH1_HUMAN	IMPDH1	18.25681506	1.09747423	3
IMDH2_HUMAN	IMPDH2	16.7891238	1.097791112	3
IQCB1_HUMAN	IQCB1	12.64730532	0.960149738	3
IST1_HUMAN	IST1	17.43293983	1.026843298	3
ITA11_HUMAN	ITGA11	18.86540047	0.959090783	3
ITIH2_HUMAN	ITIH2	18.36430761	0.879842727	3
INVO_HUMAN	IVL	17.43789497	0.978581446	3
JKIP1_HUMAN	JAKMIP1	18.85833353	1.052498105	3
JOS2_HUMAN	JOSD2	17.92280011	0.873912343	3
KANL1_HUMAN	KANSL1	17.329068	0.795728579	3
CSR2B_HUMAN	KAT14	17.77193779	0.786684581	3
KAZRN_HUMAN	KAZN	18.86720797	0.980236866	3
KBTB7_HUMAN	KBTBD7	15.13681572	0.993971978	3
KCNN4_HUMAN	KCNN4	18.60612547	0.849792249	3
KCTD4_HUMAN	KCTD4	18.89537697	0.809212008	3
K0754_HUMAN	KIAA0754	18.76964647	0.88119864	3
KDIS_HUMAN	KIDINS220	16.96854207	1.049718151	3
KIF14_HUMAN	KIF14	17.32289121	0.936866592	3
KIN17_HUMAN	KIN	18.73338067	0.758578758	3
KLF15_HUMAN	KLF15	18.71366929	0.850044879	3
KLHL2_HUMAN	KLHL2	17.65991822	0.972561394	3
KLHL3_HUMAN	KLHL3	18.32507121	0.972731386	3
KLK10_HUMAN	KLK10	18.11138557	0.979617978	3
K1C13_HUMAN	KRT13	18.48269942	0.92944263	3
K1C16_HUMAN	KRT16	18.33975426	0.878219754	3
K1C20_HUMAN	KRT20	18.08240224	0.796375272	3
K1C40_HUMAN	KRT40	17.61926307	0.791155534	3
K2C6A_HUMAN	KRT6A	17.50480231	0.791199094	3
KTI12_HUMAN	KTI12	18.71040542	1.037210659	3
KTN1_HUMAN	KTN1	16.8495298	1.004886484	3
L2HDH_HUMAN	L2HGDH	18.05690914	0.978425007	3
LAGE3_HUMAN	LAGE3	18.37018178	0.799836448	3
LALBA_HUMAN	LALBA	18.50623168	1.007783794	3
LCLT1_HUMAN	LCLAT1	18.5983449	1.006946977	3
NGAL_HUMAN	LCN2	18.08690906	0.978318744	3
LDOC1_HUMAN	LDOC1	17.15616333	0.802176153	3
LIRA4_HUMAN	LILRA4	18.83520782	1.024017577	3
LMO3_HUMAN	LMO3	17.3188767	0.797944039	3
PCAT2_HUMAN	LPCAT2	18.86587641	0.958294237	3
LYG2_HUMAN	LYG2	18.24691106	1.035927347	3
LYPD6_HUMAN	LYPD6	17.15321122	1.011577742	3
LYPA1_HUMAN	LYPLA1	18.57394623	0.793617653	3
MACF1_HUMAN	MACF1	17.74399293	1.053267363	3
MAGA4_HUMAN	MAGEA4	16.80466848	0.842823756	3
MAGBG_HUMAN	MAGEB16	18.91569527	0.842823225	3
MAGE1_HUMAN	MAGEE1	18.7193048	0.817189683	3
MAL2_HUMAN	MAL2	18.63812464	0.767921703	3
MBIP1_HUMAN	MBIP	15.93597442	0.797984168	3
MBLC2_HUMAN	MBLAC2	18.64932399	0.867209779	3
MCEM1_HUMAN	MCEMP1	18.7899545	0.87388807	3
MDC1_HUMAN	MDC1	16.03842014	0.888804199	3
MEPE_HUMAN	MEPE	18.95290545	0.897826475	3
METRL_HUMAN	METRNL	18.8693922	1.023876445	3
TRMB_HUMAN	METTL1	18.66710954	0.767722275	3
MET14_HUMAN	METTL14	18.62352968	0.962651909	3
MET17_HUMAN	METTL17	17.52392386	0.992004893	3
METL6_HUMAN	METTL6	18.07409356	1.067507128	3
MET7A_HUMAN	METTL7A	18.6479444	1.002416343	3
MFSD5_HUMAN	MFSD5	18.60600617	0.865856359	3
MGT4B_HUMAN	MGAT4B	18.62822026	0.874001915	3
MINP1_HUMAN	MINPP1	18.80269345	1.011873629	3
MITD1_HUMAN	MITD1	17.94548968	1.031957961	3
MON1A_HUMAN	MON1A	18.84367992	0.998128962	3
MRE11_HUMAN	MRE11	16.65526155	0.89250559	3
RRMJ2_HUMAN,MRM2_HUMAN	MRM2	18.66177998	0.892746512	3
MSH3_HUMAN	MSH3	17.21246458	0.919715484	3
MT3_HUMAN	MT3	18.68339778	0.879058377	3
MTFP1_HUMAN	MTFP1	18.67634916	0.776459174	3
MTDC_HUMAN	MTHFD2	18.39050813	0.912777542	3
MTUS2_HUMAN	MTUS2	16.52434728	1.034395184	3
MTX3_HUMAN	MTX3	18.09102485	0.93729281	3
MUSK_HUMAN	MUSK	18.5180128	1.067938034	3
MVP_HUMAN	MVP	17.40105126	1.019330152	3
MZF1_HUMAN	MZF1	18.51142507	0.984285417	3
NALD2_HUMAN	NAALAD2	18.80058007	0.824444155	3
NADL2_HUMAN	NAALADL2	18.18045372	0.824392202	3
SNAA_HUMAN	NAPA	17.31924224	1.060770837	3
SNAG_HUMAN	NAPG	17.4105423	1.059296038	3
NBAS_HUMAN	NBAS	17.70049666	1.061655683	3
NBEA_HUMAN	NBEA	18.46381755	0.99450858	3
NBN_HUMAN	NBN	16.59852948	0.892446651	3
NCRP1_HUMAN,FBX50_HUMAN	NCCRP1	18.60301956	0.981012679	3
NDE1_HUMAN	NDE1	17.13961845	1.087273378	3
NDEL1_HUMAN	NDEL1	16.18366085	1.089335127	3
NECD_HUMAN	NDN	15.93475616	0.817382117	3
NELL2_HUMAN	NELL2	18.42788651	0.998458459	3
NEST_HUMAN	NES	15.80863012	1.094459201	3
NOP14_HUMAN	NOP14	17.88857151	1.071492187	3
NR6A1_HUMAN	NR6A1	18.71508076	0.886845387	3
NSF_HUMAN	NSF	16.60535102	1.059619398	3
NSE4A_HUMAN	NSMCE4A	17.6704672	0.818346586	3
NSUN7_HUMAN	NSUN7	18.75464832	0.909989167	3
NUCKS_HUMAN	NUCKS1	18.6387046	0.866044605	3
NXPH2_HUMAN	NXPH2	17.49762715	0.824737692	3
OAS1_HUMAN	OAS1	18.40580449	0.950498532	3
ODFP1_HUMAN	ODF1	18.5763973	0.829735463	3
ODF2L_HUMAN	ODF2L	18.81210599	0.826557194	3
OR2T6_HUMAN	OR2T6	18.92459151	0.876703673	3
OR3A2_HUMAN	OR3A2	18.78373614	0.876323968	3
O6C70_HUMAN	OR6C70	18.82549057	0.97961314	3
OR8D2_HUMAN	OR8D2	18.92441065	0.876957661	3
A1AG1_HUMAN	ORM1	18.566685	0.871492068	3
A1AG2_HUMAN	ORM2	18.80480294	0.875221695	3
OSGEP_HUMAN	OSGEP	17.7472716	0.799769596	3
OXSR1_HUMAN	OXSR1	17.50355767	0.971762658	3
P2RY8_HUMAN	P2RY8	17.17454784	0.929723896	3
PALB2_HUMAN	PALB2	17.49229484	0.761508889	3
PANK4_HUMAN	PANK4	18.8139992	0.916483087	3
PAQR6_HUMAN	PAQR6	18.78496209	0.864367245	3
PARP3_HUMAN	PARP3	18.3747137	0.912678212	3
PARP4_HUMAN	PARP4	18.45310116	1.019377333	3
PAWR_HUMAN	PAWR	17.46009416	0.804813033	3
PBIP1_HUMAN	PBXIP1	17.43822456	0.926374696	3
PCD20_HUMAN	PCDH20	18.65768098	0.825589714	3
PCDH7_HUMAN	PCDH7	17.24917038	0.824824562	3
PCDGB_HUMAN	PCDHGA11	18.65825116	0.825263347	3
PCDGK_HUMAN	PCDHGC3	18.65722464	0.825107143	3
PC4L1_HUMAN	PCP4L1	18.86559087	0.959564024	3
PDE4B_HUMAN	PDE4B	18.51814159	0.876411329	3
PDZD8_HUMAN	PDZD8	18.38242068	0.928951172	3
PZRN4_HUMAN	PDZRN4	18.78148517	0.877027125	3
PF4V_HUMAN	PF4V1	18.78414493	0.879302384	3
PUR4_HUMAN	PFAS	17.41391305	0.854551087	3
PGAP3_HUMAN	PGAP3	18.7961394	0.866828835	3
PGBD1_HUMAN	PGBD1	17.56508108	0.982560942	3
PGPI_HUMAN	PGPEP1	18.10863025	0.873472044	3
PHF11_HUMAN	PHF11	18.82035347	1.066794145	3
PIEZ1_HUMAN	PIEZO1	18.18528107	1.021093342	3
PIGG_HUMAN	PIGG	18.78516628	0.865436941	3
PKP2_HUMAN	PKP2	16.72536633	1.089049944	3
PA24F_HUMAN	PLA2G4F	18.78342945	0.879642101	3
PKHF2_HUMAN	PLEKHF2	17.85833361	0.797113908	3
PKHH1_HUMAN	PLEKHH1	18.88559615	0.817832266	3
PMM1_HUMAN	PMM1	17.93911342	1.03675529	3
PMM2_HUMAN	PMM2	18.5897855	1.036737901	3
PLPL6_HUMAN	PNPLA6	18.25697671	1.002316597	3
POC5_HUMAN	POC5	18.41104687	0.991373525	3
POLH_HUMAN	POLH	16.91888972	0.844897352	3
DPOLL_HUMAN	POLL	16.88739664	0.910155981	3
P121A_HUMAN	POM121	16.82338641	0.927675036	3
POTEE_HUMAN	POTEE	18.47910768	1.037094008	3
COAC_HUMAN	PPCDC	18.82233199	0.983585714	3
PEPL_HUMAN	PPL	17.31484813	0.98016682	3
PPR26_HUMAN	PPP1R26	18.74580816	0.922037651	3
PRAF2_HUMAN	PRAF2	18.01418777	1.002021605	3
CC111_HUMAN,PRIPO_HUMAN	PRIMPOL	18.73594088	0.759077671	3
AAKB1_HUMAN	PRKAB1	16.76924515	0.850760086	3
AAKB2_HUMAN	PRKAB2	15.2571874	0.85043402	3
AAKG1_HUMAN	PRKAG1	16.81548266	0.850490652	3
AAKG2_HUMAN	PRKAG2	17.34918346	0.850567724	3
AAKG3_HUMAN	PRKAG3	18.50688214	0.850898756	3
KPCD3_HUMAN	PRKD3	18.49446004	1.065214932	3
PRRC1_HUMAN	PRRC1	18.46745732	1.081319289	3
PSG11_HUMAN	PSG11	18.62868827	0.805804415	3
PSG4_HUMAN	PSG4	18.64310277	0.805528124	3
PSME3_HUMAN	PSME3	14.52249706	0.835753773	3
PGES2_HUMAN	PTGES2	18.36915597	0.817560198	3
PTPS_HUMAN	PTS	18.39438721	1.046687222	3
PYGB_HUMAN	PYGB	18.08822023	0.998829353	3
DHPR_HUMAN	QDPR	18.75506759	0.875323029	3
QRIC2_HUMAN	QRICH2	18.22202112	0.808624417	3
R3HD1_HUMAN	R3HDM1	18.61799367	0.766859604	3
RAB12_HUMAN	RAB12	18.72706248	1.016198309	3
RAB17_HUMAN	RAB17	18.1823526	1.013623392	3
RAB1B_HUMAN	RAB1B	17.82586836	1.01495257	3
RAB21_HUMAN	RAB21	18.62105944	1.053297206	3
RB22A_HUMAN	RAB22A	18.33417561	1.016857504	3
RAB23_HUMAN	RAB23	18.7984628	1.066430698	3
RAB24_HUMAN	RAB24	18.57492729	1.059639018	3
RAB31_HUMAN	RAB31	18.01916839	1.014687092	3
RAB35_HUMAN	RAB35	18.11431731	1.018069388	3
RAB4A_HUMAN	RAB4A	17.27148255	1.016357272	3
RAB5B_HUMAN	RAB5B	18.00335541	1.01748924	3
RAB6A_HUMAN	RAB6A	17.33701254	1.015271571	3
RAB7A_HUMAN	RAB7A	14.29784091	1.020993895	3
RAB9A_HUMAN	RAB9A	17.93227285	1.015885969	3
RAB9B_HUMAN	RAB9B	18.05112343	1.01427763	3
RABE2_HUMAN	RABEP2	18.54197596	0.958670484	3
PGTA_HUMAN	RABGGTA	17.976851	1.014974346	3
RAD1_HUMAN	RAD1	17.53397321	0.919429721	3
RAD18_HUMAN	RAD18	16.06919053	0.842483292	3
RA51B_HUMAN	RAD51B	18.20658785	0.761769749	3
RA51C_HUMAN	RAD51C	17.78639	0.761599191	3
RAD52_HUMAN	RAD52	16.5000082	0.912015934	3
RAD9A_HUMAN	RAD9A	17.02230633	0.919364998	3
RAD9B_HUMAN	RAD9B	18.46503208	0.919473122	3
RALB_HUMAN	RALB	18.01198945	0.952991199	3
RAMP1_HUMAN	RAMP1	18.6802704	1.023317823	3
RAMP2_HUMAN	RAMP2	18.68015855	0.86559951	3
RAMP3_HUMAN	RAMP3	18.68004669	0.865612231	3
RBFA_HUMAN	RBFA	18.57762087	0.993652716	3
RBM24_HUMAN	RBM24	17.06229846	1.083253961	3
RBM38_HUMAN	RBM38	18.6373122	1.083386418	3
RBM47_HUMAN	RBM47	18.91660621	0.899306866	3
RET4_HUMAN	RBP4	18.78005044	0.878932435	3
RBNS5_HUMAN	RBSN	18.00375844	1.01679887	3
RCBT1_HUMAN	RCBTB1	18.50206001	1.083116841	3
RCBT2_HUMAN	RCBTB2	18.6051707	0.874712882	3
RELL1_HUMAN	RELL1	18.93216244	0.971809447	3
RELL2_HUMAN	RELL2	18.93225228	0.97187554	3
RETST_HUMAN	RETSAT	18.40310313	1.049930418	3
RFXK_HUMAN	RFXANK	17.67342513	0.943537402	3
RHOG_HUMAN	RHOG	17.81143083	1.005241534	3
RILP_HUMAN	RILP	18.89917366	1.020968977	3
RIN2_HUMAN	RIN2	18.68995991	1.017499534	3
RINT1_HUMAN	RINT1	17.45490926	0.964612078	3
RITA_HUMAN,RITA1_HUMAN	RITA1	18.64264059	1.069128033	3
RMI1_HUMAN	RMI1	17.63519844	0.913240605	3
RMI2_HUMAN	RMI2	18.45813267	0.913260895	3
RNF13_HUMAN	RNF13	17.16914659	1.092791629	3
RN135_HUMAN	RNF135	18.40934925	0.991752695	3
RN170_HUMAN	RNF170	17.86925676	1.006269802	3
RN182_HUMAN	RNF182	18.75820724	0.816688734	3
RN220_HUMAN	RNF220	18.5971432	1.033474165	3
RNF8_HUMAN	RNF8	17.07998576	0.890525591	3
ROBO3_HUMAN	ROBO3	18.76767872	0.998518271	3
RFA1_HUMAN	RPA1	14.83109142	0.758740662	3
RFA2_HUMAN	RPA2	14.79552268	0.903305156	3
RFA3_HUMAN	RPA3	16.26786043	0.912440799	3
RFA4_HUMAN	RPA4	17.89124098	0.902627645	3
RPIA_HUMAN	RPIA	17.54873474	0.813188058	3
RUSD2_HUMAN	RPUSD2	18.67915141	0.892209839	3
RUFY1_HUMAN	RUFY1	17.53336665	1.041380243	3
S1A7A_HUMAN	S100A7A	18.68105304	0.97984805	3
SAAL1_HUMAN	SAAL1	17.74550732	0.948049552	3
SACS_HUMAN	SACS	18.36032551	1.046064886	3
SAM11_HUMAN	SAMD11	18.82509622	0.80594219	3
SAMD7_HUMAN	SAMD7	18.55127292	0.805905048	3
SBSN_HUMAN	SBSN	18.29356544	0.977493103	3
SC5D_HUMAN	SC5D	18.8470707	1.007258954	3
SCAM1_HUMAN	SCAMP1	17.54483685	1.045770911	3
SCAM2_HUMAN	SCAMP2	18.2809706	1.045546279	3
SCND1_HUMAN	SCAND1	17.66723166	0.982640262	3
SCAR3_HUMAN	SCARA3	16.61954581	0.947434068	3
SCRB1_HUMAN	SCARB1	17.99607671	0.867398457	3
SCFD1_HUMAN	SCFD1	17.31411414	1.060090621	3
SCFD2_HUMAN	SCFD2	18.39768131	1.059157213	3
SG1D1_HUMAN	SCGB1D1	18.37383795	0.975943234	3
SEGN_HUMAN	SCGN	17.05542252	1.04355524	3
SDCG8_HUMAN	SDCCAG8	18.519686	0.947460012	3
SC16A_HUMAN	SEC16A	14.1465246	1.07998837	3
SC22B_HUMAN	SEC22B	17.71612826	1.055543685	3
SC23B_HUMAN	SEC23B	17.66669152	1.081090075	3
SC24A_HUMAN	SEC24A	18.65448274	1.080278904	3
SC24B_HUMAN	SEC24B	18.07749983	1.078429513	3
SC24C_HUMAN	SEC24C	17.6891618	1.081098174	3
SELO_HUMAN	SELENOO	18.17907075	0.873454657	3
SEMG1_HUMAN	SEMG1	17.84868995	0.910167808	3
SEMG2_HUMAN	SEMG2	18.08990382	0.910197372	3
SERC1_HUMAN	SERINC1	18.32765812	0.929787986	3
AACT_HUMAN	SERPINA3	18.25826911	0.861030491	3
SPB13_HUMAN	SERPINB13	18.845425	1.083315697	3
SPB4_HUMAN	SERPINB4	17.17992383	0.979144283	3
SRTD3_HUMAN	SERTAD3	18.47790793	0.871908763	3
SFI1_HUMAN	SFI1	18.32552814	0.905747935	3
PSPC_HUMAN	SFTPC	18.56717874	0.890402714	3
SGCG_HUMAN	SGCG	18.92214737	0.970202253	3
SGSM1_HUMAN	SGSM1	18.8195611	0.991284912	3
SHSA2_HUMAN	SHISA2	18.67747088	0.817628802	3
SIDT2_HUMAN	SIDT2	18.3979673	1.011742768	3
SLAI2_HUMAN	SLAIN2	16.52361725	0.822501855	3
UT2_HUMAN	SLC14A2	18.8816604	0.830614179	3
MOT8_HUMAN	SLC16A2	18.65996001	1.046610288	3
MOT5_HUMAN	SLC16A4	18.95096281	0.960548296	3
S22A1_HUMAN	SLC22A1	18.83842873	0.816559418	3
S22AI_HUMAN	SLC22A18	18.44777373	0.951091165	3
SCMC1_HUMAN	SLC25A24	18.37864635	1.025359941	3
S27A3_HUMAN	SLC27A3	18.87582574	0.940970123	3
S27A6_HUMAN	SLC27A6	18.80740935	1.049876273	3
COPT1_HUMAN	SLC31A1	18.61064984	1.070847197	3
COPT2_HUMAN	SLC31A2	18.44407099	0.865632909	3
S35F2_HUMAN	SLC35F2	18.64943888	1.006608046	3
S35F5_HUMAN	SLC35F5	18.87563703	0.941090195	3
S38A6_HUMAN	SLC38A6	18.86177693	0.868282982	3
S39A6_HUMAN	SLC39A6	18.87573139	0.941223652	3
CTL1_HUMAN	SLC44A1	18.39982456	1.001685816	3
SC5A1_HUMAN	SLC5A1	18.52417871	0.804807959	3
SC5A2_HUMAN	SLC5A2	18.82341874	0.805808838	3
SC5A7_HUMAN	SLC5A7	18.91915301	0.804754617	3
S6A15_HUMAN	SLC6A15	18.7371124	1.04655301	3
SL9A8_HUMAN	SLC9A8	18.78312268	0.8765651	3
SMAP2_HUMAN	SMAP2	18.28049559	1.020071699	3
SMAL1_HUMAN	SMARCAL1	18.45894652	0.911299427	3
SNP23_HUMAN	SNAP23	16.29935351	1.061357142	3
SNP25_HUMAN	SNAP25	16.79144002	1.065706084	3
SNP29_HUMAN	SNAP29	15.71219762	1.063088874	3
SNP47_HUMAN	SNAP47	18.55189839	1.062640787	3
SNAPN_HUMAN	SNAPIN	16.67463434	0.830629907	3
SNTG1_HUMAN	SNTG1	18.49037729	1.057193867	3
SNX25_HUMAN	SNX25	18.76508443	1.007316065	3
SNX7_HUMAN	SNX7	18.41654686	0.832554648	3
SOAT1_HUMAN	SOAT1	16.67271169	1.010002904	3
SORL_HUMAN	SORL1	17.16288268	0.998064443	3
SOX30_HUMAN	SOX30	18.71908856	1.07328789	3
SP6_HUMAN	SP6	18.05729382	0.998094941	3
SPAG4_HUMAN	SPAG4	18.74295218	0.829661814	3
SPAG5_HUMAN	SPAG5	17.24098383	0.829739109	3
SPAST_HUMAN	SPAST	18.23692098	1.026374265	3
SPCS1_HUMAN	SPCS1	18.53438228	0.775978021	3
SPEF2_HUMAN	SPEF2	18.77604422	0.875779535	3
ISK5_HUMAN	SPINK5	18.88709195	1.034239837	3
SPIT1_HUMAN	SPINT1	18.40637238	1.033185881	3
SPIT2_HUMAN	SPINT2	14.92871401	0.941099124	3
SPRR3_HUMAN	SPRR3	18.65847916	0.873825064	3
SPTC2_HUMAN	SPTLC2	18.4825666	1.049494602	3
SRGP3_HUMAN	SRGAP3	17.43360175	0.841396525	3
SSRG_HUMAN	SSR3	18.41921684	0.887835499	3
SSR1_HUMAN	SSTR1	18.73199151	0.779509104	3
SSR4_HUMAN	SSTR4	18.95378739	0.779526835	3
SSR5_HUMAN	SSTR5	18.74559685	0.779431756	3
ST14_HUMAN	ST14	18.87525952	1.033092027	3
SIA7C_HUMAN	ST6GALNAC3	18.30540405	0.970783342	3
STEA3_HUMAN	STEAP3	17.76897599	1.046359139	3
STIM1_HUMAN	STIM1	18.1945341	1.067248038	3
STIM2_HUMAN	STIM2	18.37690017	1.067172778	3
STK16_HUMAN	STK16	17.32580207	0.813109297	3
STX10_HUMAN	STX10	18.17073777	1.057447694	3
STX11_HUMAN	STX11	17.4276307	1.065577427	3
STX12_HUMAN	STX12	15.09961424	1.063448979	3
STX16_HUMAN	STX16	18.3376466	1.057052076	3
STX18_HUMAN	STX18	16.57712173	1.061746034	3
STX19_HUMAN	STX19	17.32179773	1.066723435	3
STX2_HUMAN	STX2	17.9055938	1.066241128	3
STX4_HUMAN	STX4	16.41574369	1.06369665	3
STX5_HUMAN	STX5	16.14979319	1.062181949	3
STX6_HUMAN	STX6	16.41333483	1.061824406	3
STX7_HUMAN	STX7	15.67154573	1.062562024	3
STX8_HUMAN	STX8	16.82619605	1.059416117	3
STXB3_HUMAN	STXBP3	17.87490505	1.066268626	3
STXB5_HUMAN	STXBP5	17.71509274	1.063594307	3
STB5L_HUMAN	STXBP5L	18.85112647	1.06664079	3
STXB6_HUMAN	STXBP6	18.704507	1.063995133	3
ST1A2_HUMAN	SULT1A2	18.19145803	1.066747445	3
SUN1_HUMAN	SUN1	18.06323997	1.067634909	3
SUSD3_HUMAN	SUSD3	17.20158475	0.979201541	3
SVOP_HUMAN	SVOP	18.78485997	0.865255158	3
SVOPL_HUMAN	SVOPL	18.86511482	0.959370028	3
SWAP1_HUMAN	SWSAP1	18.25632997	0.76208759	3
SYBU_HUMAN	SYBU	18.42983516	0.836623984	3
SYNE1_HUMAN	SYNE1	18.07390403	1.067843773	3
SNG3_HUMAN	SYNGR3	18.7244824	0.864683704	3
SYPL1_HUMAN	SYPL1	18.93530234	1.065513401	3
SYT17_HUMAN	SYT17	18.16006002	0.868667908	3
SYT9_HUMAN	SYT9	18.58627099	0.831914165	3
TACC3_HUMAN	TACC3	16.06593283	0.826851587	3
TBCC_HUMAN	TBCC	18.87147758	0.934693833	3
TBKB1_HUMAN	TBKBP1	17.77267705	0.810164084	3
TEAD4_HUMAN	TEAD4	16.87455377	0.793447857	3
TEKT4_HUMAN	TEKT4	17.68411754	0.843167658	3
TRFE_HUMAN	TF	16.89005427	0.868218265	3
TFG_HUMAN	TFG	14.99960116	1.034383241	3
TFR2_HUMAN	TFR2	18.60254098	0.868151087	3
TFR1_HUMAN	TFRC	16.92868528	0.868073549	3
TGM3_HUMAN	TGM3	18.18751547	0.848876722	3
THADA_HUMAN	THADA	18.49419708	0.934141235	3
THAP1_HUMAN	THAP1	17.01851441	0.805780576	3
THA11_HUMAN	THAP11	17.30378878	0.938604238	3
THUM3_HUMAN	THUMPD3	18.58784779	0.842462564	3
TIMP3_HUMAN	TIMP3	17.91499119	1.010533147	3
TM2D3_HUMAN	TM2D3	17.46782792	0.776087171	3
TMED1_HUMAN	TMED1	18.00697755	0.95432319	3
T106B_HUMAN	TMEM106B	18.80209002	0.776155648	3
T120B_HUMAN	TMEM120B	18.56643805	0.9273789	3
T131L_HUMAN	TMEM131L	18.80188881	0.776196914	3
TM147_HUMAN	TMEM147	18.78526837	0.865968106	3
TM192_HUMAN	TMEM192	18.55302338	1.04890505	3
TM199_HUMAN	TMEM199	18.73027946	1.002943471	3
TM214_HUMAN	TMEM214	17.48092056	1.011474505	3
TM245_HUMAN	TMEM245	18.65173429	1.011035272	3
TMM59_HUMAN	TMEM59	18.87034057	0.928284447	3
TMM68_HUMAN	TMEM68	18.8025929	1.011542933	3
TMM79_HUMAN	TMEM79	18.45826835	0.890501912	3
TMM89_HUMAN	TMEM89	18.81499437	0.875594206	3
TMX1_HUMAN	TMX1	18.62341217	1.011627975	3
TMX3_HUMAN	TMX3	18.79634162	0.887476241	3
TR11B_HUMAN	TNFRSF11B	18.60743699	1.051945546	3
TNF11_HUMAN	TNFSF11	18.00355694	1.051962205	3
TNIP3_HUMAN	TNIP3	18.59654188	0.791022505	3
TNNT3_HUMAN	TNNT3	18.73732528	0.873505431	3
TNPO2_HUMAN	TNPO2	17.09474225	0.933949657	3
TNPO3_HUMAN	TNPO3	16.71118713	0.947211287	3
TOP3A_HUMAN	TOP3A	17.17371853	0.913317056	3
TP53B_HUMAN	TP53BP1	15.86309026	0.900489832	3
PRPK_HUMAN	TP53RK	17.58381417	0.799769388	3
TPD52_HUMAN	TPD52	18.21734594	0.76790381	3
TPD53_HUMAN	TPD52L1	18.21801498	0.76783676	3
TPD54_HUMAN	TPD52L2	17.94993212	0.767706185	3
TPRKB_HUMAN	TPRKB	18.36489638	0.799747183	3
TRML2_HUMAN	TREML2	18.12994857	0.928546991	3
TRFR_HUMAN	TRHR	18.94369299	1.056488549	3
TRI29_HUMAN	TRIM29	16.31346789	1.079585352	3
TRIM4_HUMAN	TRIM4	18.5675489	1.014680439	3
TRI54_HUMAN	TRIM54	18.32278379	0.791382141	3
TRIM7_HUMAN	TRIM7	18.69934843	0.852333468	3
TRI74_HUMAN	TRIM74	18.89286984	0.836070095	3
TRIM9_HUMAN	TRIM9	18.35914298	1.065867585	3
TRPM7_HUMAN	TRPM7	17.99140217	1.063157858	3
TRPV1_HUMAN	TRPV1	18.43150281	0.831874285	3
TSNA1_HUMAN	TSNARE1	18.6312589	1.087223391	3
TSN13_HUMAN	TSPAN13	18.78557457	0.864541261	3
TSN17_HUMAN	TSPAN17	16.89904453	1.002622735	3
TSN5_HUMAN	TSPAN5	16.00221478	1.007154711	3
TSSK3_HUMAN	TSSK3	18.91924387	1.069018377	3
TTC14_HUMAN	TTC14	18.91149562	0.796667883	3
TT21A_HUMAN	TTC21A	18.5443702	1.046331766	3
TTC28_HUMAN	TTC28	18.02689532	0.883932393	3
TTC7A_HUMAN	TTC7A	18.86958193	1.024320875	3
TTPAL_HUMAN	TTPAL	18.95660504	0.877089821	3
TTHY_HUMAN	TTR	17.56183035	0.879015813	3
TTYH3_HUMAN	TTYH3	18.08277849	1.008247092	3
TXLNB_HUMAN	TXLNB	18.15794775	1.072274498	3
TXD12_HUMAN	TXNDC12	18.7504472	0.972323538	3
TXND2_HUMAN	TXNDC2	18.78025551	0.871732212	3
TYPH_HUMAN	TYMP	18.24380869	0.979293407	3
TYSD1_HUMAN	TYSND1	18.79005616	0.873875017	3
TYW1_HUMAN	TYW1	18.09456757	1.003546357	3
UBIA1_HUMAN	UBIAD1	18.60230162	1.010192175	3
UBR3_HUMAN	UBR3	17.39251039	0.986325369	3
UCP2_HUMAN	UCP2	17.64872287	0.976895232	3
UD110_HUMAN	UGT1A10	17.38735524	0.980023692	3
UD17_HUMAN	UGT1A7	18.68127656	0.979998587	3
UD19_HUMAN	UGT1A9	18.67702232	0.979961767	3
UIMC1_HUMAN	UIMC1	15.67613426	0.886831888	3
UPK3L_HUMAN	UPK3BL1	18.19572813	1.002804706	3
USE1_HUMAN	USE1	17.54273251	1.062355764	3
USO1_HUMAN	USO1	16.72720296	1.073651814	3
UBP28_HUMAN	USP28	18.03417828	0.900583537	3
UTP20_HUMAN	UTP20	18.08221407	0.922057288	3
VAMP1_HUMAN	VAMP1	18.3118945	1.06119424	3
VAMP2_HUMAN	VAMP2	16.91525968	1.065522818	3
VAMP3_HUMAN	VAMP3	17.01518618	1.063831314	3
VAMP4_HUMAN	VAMP4	17.16789654	1.058249014	3
VAMP7_HUMAN	VAMP7	17.29149933	1.062910598	3
VAMP8_HUMAN	VAMP8	17.01280297	1.063303171	3
VAX2_HUMAN	VAX2	18.86616187	1.032250056	3
VPS45_HUMAN	VPS45	18.08522107	1.056989417	3
CC132_HUMAN,VPS50_HUMAN	VPS50	17.22403675	0.766812653	3
FFR_HUMAN,VPS51_HUMAN	VPS51	17.60053128	0.961443519	3
VPS52_HUMAN	VPS52	17.65774231	0.961523422	3
VPS53_HUMAN	VPS53	17.9217187	0.961514327	3
VPS54_HUMAN	VPS54	18.2263454	0.961531469	3
VSIG2_HUMAN	VSIG2	16.84622527	0.934119951	3
VSIG8_HUMAN	VSIG8	17.46203248	1.036295746	3
VTM2A_HUMAN	VSTM2A	18.82154099	0.841498835	3
VTA1_HUMAN	VTA1	17.76650197	1.030597293	3
VTI1A_HUMAN	VTI1A	18.03260749	1.05835228	3
VTI1B_HUMAN	VTI1B	15.34189794	1.056780104	3
WDFY2_HUMAN	WDFY2	17.02277944	1.041467498	3
WDR25_HUMAN	WDR25	18.91778936	0.835644283	3
WNK1_HUMAN	WNK1	17.30156409	0.971731214	3
WNK2_HUMAN	WNK2	18.64851943	0.972912027	3
WNK3_HUMAN	WNK3	18.43925332	0.972763617	3
WNK4_HUMAN	WNK4	18.21466584	0.972613947	3
WRN_HUMAN	WRN	16.20986248	0.903649201	3
FL2D_HUMAN	WTAP	17.85993305	0.962622536	3
XPA_HUMAN	XPA	17.28398672	0.90268396	3
XPC_HUMAN	XPC	16.59097874	0.905395435	3
XPP1_HUMAN	XPNPEP1	18.56223177	0.964520029	3
XPO4_HUMAN	XPO4	17.40309166	0.922441341	3
XPO6_HUMAN	XPO6	17.29784667	0.932796038	3
XPO7_HUMAN	XPO7	17.41020468	0.944029519	3
XPOT_HUMAN	XPOT	17.39216743	0.96853246	3
XRCC2_HUMAN	XRCC2	18.00998731	0.76184014	3
YETS2_HUMAN	YEATS2	17.32325547	0.78744835	3
YIPF4_HUMAN	YIPF4	18.5732099	1.006769903	3
YKT6_HUMAN	YKT6	17.66696162	1.064654089	3
SCND3_HUMAN	ZBED9	18.3827105	0.982041414	3
ZBTB1_HUMAN	ZBTB1	18.26278109	0.928667928	3
ZF161_HUMAN,ZBT14_HUMAN	ZBTB14	18.34874355	0.919198153	3
ZBT8A_HUMAN	ZBTB8A	17.56685033	0.807913342	3
ZBTB9_HUMAN	ZBTB9	18.26679473	0.802937976	3
ZC4H2_HUMAN	ZC4H2	18.31420366	1.033382774	3
ZCH10_HUMAN	ZCCHC10	17.98711746	0.806309369	3
ZDH18_HUMAN	ZDHHC18	18.33432674	1.009696601	3
ZDHC9_HUMAN	ZDHHC9	18.20184935	0.928018455	3
ZFP41_HUMAN	ZFP41	16.32741105	0.998267975	3
ZKSC1_HUMAN	ZKSCAN1	18.03887781	0.984611562	3
ZKSC3_HUMAN	ZKSCAN3	18.34829576	0.9828724	3
ZKSC4_HUMAN	ZKSCAN4	17.66777155	0.983003013	3
ZKSC5_HUMAN	ZKSCAN5	18.71203852	0.985449899	3
ZN167_HUMAN,ZKSC7_HUMAN	ZKSCAN7	18.32796208	0.985180264	3
ZN192_HUMAN,ZKSC8_HUMAN	ZKSCAN8	18.07995365	0.982227795	3
ZNF10_HUMAN	ZNF10	18.71973716	1.089374688	3
ZN101_HUMAN	ZNF101	18.704726	1.062503752	3
ZN165_HUMAN	ZNF165	17.72463587	0.987854993	3
ZNF17_HUMAN	ZNF17	18.88662472	1.08949834	3
ZN174_HUMAN	ZNF174	18.04569704	0.982350154	3
ZN197_HUMAN	ZNF197	17.98096859	0.981877088	3
ZN200_HUMAN	ZNF200	18.82795219	0.801819387	3
ZN202_HUMAN	ZNF202	18.8598652	0.984747275	3
ZN205_HUMAN	ZNF205	18.27382487	0.794941227	3
ZN213_HUMAN	ZNF213	18.42886125	0.983945056	3
ZN215_HUMAN	ZNF215	18.81040942	0.982103325	3
ZN230_HUMAN	ZNF230	18.88671818	1.089233373	3
ZN232_HUMAN	ZNF232	18.08747117	0.983544845	3
ZNF24_HUMAN	ZNF24	17.14728415	0.982564426	3
ZN250_HUMAN	ZNF250	17.67691109	1.033351331	3
ZN253_HUMAN	ZNF253	18.91387122	0.802250084	3
ZN263_HUMAN	ZNF263	18.06972637	0.983355663	3
ZN276_HUMAN	ZNF276	18.67859151	0.807793047	3
ZN318_HUMAN	ZNF318	18.26326346	1.096936127	3
ZN337_HUMAN	ZNF337	18.91176998	0.797283389	3
ZN365_HUMAN	ZNF365	18.76144256	1.087414003	3
ZN394_HUMAN	ZNF394	18.61834783	0.982754212	3
ZN396_HUMAN	ZNF396	17.68624414	0.982379078	3
ZN397_HUMAN	ZNF397	16.68292887	0.982781795	3
ZN408_HUMAN	ZNF408	17.62038858	0.802162931	3
ZN439_HUMAN	ZNF439	18.48482258	1.034687787	3
ZN444_HUMAN	ZNF444	17.2441094	0.983145375	3
ZN445_HUMAN	ZNF445	18.53400128	0.981713389	3
ZN446_HUMAN	ZNF446	17.51471121	0.983207202	3
ZN449_HUMAN	ZNF449	18.81050929	0.984434189	3
ZN471_HUMAN	ZNF471	18.72103326	0.935550186	3
ZN483_HUMAN	ZNF483	18.54989569	0.984895974	3
ZN490_HUMAN	ZNF490	18.48495515	1.035371416	3
ZN496_HUMAN	ZNF496	17.82492718	0.983832281	3
ZN500_HUMAN	ZNF500	18.79937068	0.985971446	3
ZN501_HUMAN	ZNF501	18.48984943	0.842491375	3
ZN558_HUMAN	ZNF558	18.49064113	0.874759466	3
ZN607_HUMAN	ZNF607	18.68451265	1.034169732	3
ZN821_HUMAN	ZNF821	18.9109467	0.796928276	3
ZNF91_HUMAN	ZNF91	18.88681163	1.089602961	3
BCD1_HUMAN	ZNHIT6	18.3145112	0.787400712	3
ZSCA1_HUMAN	ZSCAN1	17.88299014	0.983964428	3
ZSC16_HUMAN	ZSCAN16	18.67735876	0.983208848	3
ZSC18_HUMAN	ZSCAN18	18.42495732	0.984057196	3
ZSC20_HUMAN	ZSCAN20	15.65300621	0.982457444	3
ZSC21_HUMAN	ZSCAN21	18.49050922	0.981568911	3
ZSC22_HUMAN	ZSCAN22	18.61964549	0.982530698	3
ZSC23_HUMAN	ZSCAN23	18.64920909	0.981421495	3
ZSC29_HUMAN	ZSCAN29	18.80430103	0.981301081	3
ZN434_HUMAN,ZSC32_HUMAN	ZSCAN32	16.65851311	0.98264581	3
ZSWM7_HUMAN	ZSWIM7	18.83833126	0.762065897	3
BRE_HUMAN		16.42691874	0.887377394	3
CA049_HUMAN		16.80980367	0.830943756	3
CA065_HUMAN		18.39022027	0.796833768	3
CATL3_HUMAN		18.82578624	0.876146011	3
CB048_HUMAN		17.96919434	0.82518817	3
CB060_HUMAN		18.03672625	1.067575214	3
CC026_HUMAN		17.93141491	0.824109952	3
CC037_HUMAN		18.22916404	0.902482793	3
CCZ1B_HUMAN		18.30896288	0.997625341	3
CD029_HUMAN		18.67533868	0.873224012	3
CE035_HUMAN		18.91669727	1.073679868	3
CF165_HUMAN		18.18373163	1.073350945	3
CHMP3_HUMAN		17.54243157	1.032273074	3
CI016_HUMAN		18.29794123	0.796301081	3
CI064_HUMAN		18.78588069	0.91040041	3
CI068_HUMAN		18.6001451	0.928675166	3
CJ032_HUMAN		18.67488929	0.826668218	3
CL035_HUMAN		18.77140424	1.054233286	3
CL072_HUMAN		18.50466908	0.873337725	3
CM016_HUMAN		17.84314275	1.046587102	3
CN142_HUMAN		18.72135706	0.799624044	3
CO4A_HUMAN		18.16251943	0.87560481	3
CP007_HUMAN		18.86948707	1.024190144	3
CP068_HUMAN		18.79553252	0.758538026	3
CP073_HUMAN		18.8153922	0.80581742	3
CQ059_HUMAN		15.80317614	0.826661506	3
CS052_HUMAN		17.50199997	1.098852159	3
CT024_HUMAN		16.77160173	0.943827892	3
CT195_HUMAN		18.05594688	0.811054214	3
F134C_HUMAN		16.35986355	1.006991035	3
F16B2_HUMAN		18.81975924	1.096940712	3
F175A_HUMAN		17.70651393	0.887378968	3
F175B_HUMAN		17.21806569	0.886661799	3
F208B_HUMAN		18.2431545	0.801863395	3
F75A7_HUMAN		18.7830204	0.878446275	3
FA26D_HUMAN		18.55164825	0.831656807	3
FXL13_HUMAN		18.85670389	0.905593884	3
GRM1C_HUMAN		18.33644049	1.049245295	3
GTR4_HUMAN		16.58407111	1.020153374	3
HBA_HUMAN		17.19060096	0.875019591	3
IGHG1_HUMAN		16.98381214	0.877333313	3
IGHG2_HUMAN		17.4894618	0.880598587	3
IGHG4_HUMAN		18.56939794	0.870749205	3
IGKC_HUMAN		17.29187368	0.87740287	3
ITFG3_HUMAN		18.70077759	1.064141671	3
L12R1_HUMAN		18.35395503	0.830267687	3
LECT1_HUMAN		18.7666417	0.872168173	3
LPPR1_HUMAN		18.09679946	1.066418393	3
LPPR3_HUMAN		18.79836188	1.066460348	3
MAGD4_HUMAN		18.44996233	0.818357484	3
MF2NB_HUMAN		18.514013	0.82645638	3
N6MT2_HUMAN		18.87327555	0.817351348	3
NAGT1_HUMAN		18.30617864	0.850530511	3
PRB3_HUMAN		18.9243202	0.876494818	3
QTRD1_HUMAN		18.78404275	0.88278276	3
SCNM1_HUMAN		17.51809776	0.964701205	3
SOLH2_HUMAN		18.90865674	0.987946456	3
SPERT_HUMAN		17.65501661	0.991864166	3
SSA27_HUMAN		17.19549561	0.808760025	3
SSPO_HUMAN		18.65665395	0.88391916	3
ST1A3_HUMAN,ST1A4_HUMAN		18.67578789	1.066842326	3
TBRG4_HUMAN		18.01598328	0.866801092	3
YK021_HUMAN		18.84222366	0.885364938	3
Z385C_HUMAN		18.65471148	0.80532586	3
Z397O_HUMAN		18.42230066	0.983085119	3
ZBT48_HUMAN		18.58152758	0.807945609	3
ZSC12_HUMAN		18.76788601	0.985159068	3
ZUFSP_HUMAN		18.14874947	0.912437858	3
AAGAB_HUMAN	AAGAB	17.73384565	1.137072995	4
AAK1_HUMAN	AAK1	17.86721656	1.155226441	4
ABCG2_HUMAN	ABCG2	18.10789439	1.26696455	4
ABLM1_HUMAN	ABLIM1	16.70059328	1.216619127	4
ABLM3_HUMAN	ABLIM3	18.78669661	1.201285919	4
ACADL_HUMAN	ACADL	18.68094127	1.157429602	4
ACTS_HUMAN	ACTA1	15.50351986	1.384482393	4
ACTB_HUMAN	ACTB	14.03755013	1.275643061	4
ACTC_HUMAN	ACTC1	17.49417966	1.201320317	4
ACTG_HUMAN	ACTG1	14.827903	1.224813984	4
ACTN1_HUMAN	ACTN1	15.4434412	1.188505093	4
ACTN3_HUMAN	ACTN3	18.38227574	1.1906471	4
ACTN4_HUMAN	ACTN4	15.64362309	1.214744914	4
ARP10_HUMAN	ACTR10	17.72822623	1.308891975	4
ACTZ_HUMAN	ACTR1A	17.3591107	1.308990697	4
ACTY_HUMAN	ACTR1B	17.20683605	1.30880671	4
ARP2_HUMAN	ACTR2	15.07412705	1.242358896	4
ARP3_HUMAN	ACTR3	16.37075865	1.239412011	4
ARP3B_HUMAN	ACTR3B	17.67019792	1.238962201	4
ACTT1_HUMAN	ACTRT1	18.46111397	1.141838988	4
ADAP2_HUMAN	ADAP2	18.80289452	1.205975647	4
ADCY8_HUMAN	ADCY8	18.7627966	1.327721519	4
ADDA_HUMAN	ADD1	16.57293183	1.193280123	4
ADDG_HUMAN	ADD3	17.74525506	1.193005803	4
AA1R_HUMAN	ADORA1	18.09847054	1.188290875	4
AA2AR_HUMAN	ADORA2A	17.68491547	1.188363465	4
ADA2A_HUMAN	ADRA2A	18.43676778	1.251336043	4
ADA2C_HUMAN	ADRA2C	18.70702299	1.251419945	4
AFAP1_HUMAN	AFAP1	16.84125059	1.236832289	4
AFTIN_HUMAN	AFTPH	18.48892508	1.135973127	4
CBPC1_HUMAN	AGTPBP1	18.56198387	1.226658085	4
AIF1_HUMAN	AIF1	18.85209003	1.12383288	4
AIF1L_HUMAN	AIF1L	18.87535391	1.366069982	4
ALKB2_HUMAN	ALKBH2	18.52686592	1.206492597	4
ANKR1_HUMAN	ANKRD1	18.69659505	1.16709784	4
ANKR2_HUMAN	ANKRD2	18.31635471	1.385715889	4
ANR23_HUMAN	ANKRD23	18.84300056	1.325717502	4
ANLN_HUMAN	ANLN	13.45462007	1.204569281	4
ANTR1_HUMAN	ANTXR1	16.34545847	1.300908899	4
ANX10_HUMAN	ANXA10	18.92332483	1.417037779	4
ANXA2_HUMAN	ANXA2	15.63257843	1.263789982	4
AP1AR_HUMAN	AP1AR	18.81886733	1.136180124	4
AP1B1_HUMAN	AP1B1	16.69431568	1.136523696	4
AP1G1_HUMAN	AP1G1	17.06640437	1.136602283	4
AP1G2_HUMAN	AP1G2	17.61050281	1.13541149	4
AP1M1_HUMAN	AP1M1	16.96058065	1.136380684	4
AP1M2_HUMAN	AP1M2	17.33051655	1.135508783	4
AP1S1_HUMAN	AP1S1	17.68836681	1.13550841	4
AP1S2_HUMAN	AP1S2	16.86536912	1.136516815	4
AP1S3_HUMAN	AP1S3	18.42607408	1.13703835	4
AP2A1_HUMAN	AP2A1	15.41888394	1.154973991	4
AP2A2_HUMAN	AP2A2	16.55672759	1.146823139	4
AP2B1_HUMAN	AP2B1	15.80726905	1.150782729	4
AP2M1_HUMAN	AP2M1	13.70899594	1.154974342	4
AP2S1_HUMAN	AP2S1	17.2603806	1.150849787	4
AQP4_HUMAN	AQP4	18.88475391	1.155689466	4
ARF1_HUMAN	ARF1	16.71983876	1.319840335	4
ARF3_HUMAN	ARF3	17.91803429	1.126465338	4
ARFP1_HUMAN	ARFIP1	18.06553347	1.126649899	4
RHGBA_HUMAN	ARHGAP11A	17.60737821	1.233212304	4
RHG21_HUMAN	ARHGAP21	16.98283307	1.231004678	4
RHG24_HUMAN	ARHGAP24	18.91869864	1.240816038	4
ARHGH_HUMAN	ARHGEF17	17.89832938	1.209178765	4
ARHGI_HUMAN	ARHGEF18	18.43483086	1.367860183	4
ARHG3_HUMAN	ARHGEF3	18.68962714	1.205705039	4
ARC1A_HUMAN	ARPC1A	17.56419543	1.238867129	4
ARC1B_HUMAN	ARPC1B	16.72168424	1.239182595	4
ARPC2_HUMAN	ARPC2	16.90848761	1.239182892	4
ARPC3_HUMAN	ARPC3	16.23829159	1.239228605	4
ARPC4_HUMAN	ARPC4	16.80524019	1.239191296	4
ARPC5_HUMAN	ARPC5	17.10667641	1.238751279	4
ARP5L_HUMAN	ARPC5L	16.80180565	1.239575072	4
ARX_HUMAN	ARX	17.3177794	1.156103144	4
ASPD_HUMAN	ASPDH	18.9127754	1.193653294	4
ATAD2_HUMAN	ATAD2	18.27589376	1.220117389	4
ATOX1_HUMAN	ATOX1	18.70571099	1.306279063	4
VATC1_HUMAN	ATP6V1C1	18.10936565	1.343292298	4
ATP7B_HUMAN	ATP7B	18.12361264	1.306283234	4
AZI2_HUMAN	AZI2	18.0980994	1.354993534	4
BACE1_HUMAN	BACE1	18.10439257	1.125477391	4
BASP1_HUMAN	BASP1	17.23706489	1.243227937	4
BODG_HUMAN	BBOX1	17.77366199	1.353628617	4
BFSP1_HUMAN	BFSP1	18.69416661	1.2006728	4
BFSP2_HUMAN	BFSP2	18.45514362	1.200691987	4
BICD2_HUMAN	BICD2	17.48693767	1.309390484	4
BMP2K_HUMAN	BMP2K	16.67399382	1.152936057	4
BOD1_HUMAN	BOD1	18.09902703	1.418948346	4
BD1L2_HUMAN	BOD1L2	18.8037989	1.418968609	4
BRI3_HUMAN	BRI3	18.87846442	1.125455633	4
BTBD3_HUMAN	BTBD3	18.56185989	1.144764473	4
CL004_HUMAN	C12orf4	18.80088222	1.279170821	4
C10_HUMAN	C12orf57	18.74623066	1.250094991	4
CS054_HUMAN	C19orf54	18.53995588	1.158040915	4
CT027_HUMAN	C20orf27	18.30043422	1.252941999	4
C2CD3_HUMAN	C2CD3	18.64897925	1.203938663	4
C4BPB_HUMAN	C4BPB	17.9139024	1.308192089	4
CO8A_HUMAN	C8A	18.72663287	1.406456052	4
CO8G_HUMAN	C8G	18.84881064	1.406465707	4
CO9_HUMAN	C9	18.71236486	1.406346512	4
SMRP1_HUMAN	C9orf24	18.40424132	1.307071796	4
CAH11_HUMAN	CA11	18.35440063	1.301178106	4
CAGE1_HUMAN	CAGE1	18.8093103	1.200168596	4
CALD1_HUMAN	CALD1	17.20844701	1.392181532	4
CALL3_HUMAN	CALML3	16.53668729	1.119879867	4
CALY_HUMAN	CALY	18.63382381	1.196150636	4
KCC2G_HUMAN	CAMK2G	17.2319502	1.211456678	4
CAP1_HUMAN	CAP1	17.69970948	1.275563068	4
CAP2_HUMAN	CAP2	18.36622001	1.275535663	4
CAZA1_HUMAN	CAPZA1	16.18169602	1.25914148	4
CAZA2_HUMAN	CAPZA2	11.93272116	1.165384829	4
CAPZB_HUMAN	CAPZB	15.8925479	1.256145642	4
CAR10_HUMAN	CARD10	17.70912033	1.185394091	4
CCD50_HUMAN	CCDC50	18.31497236	1.262134693	4
CC85C_HUMAN	CCDC85C	17.28549318	1.28832448	4
CD59_HUMAN	CD59	17.27072033	1.406275134	4
CDCA2_HUMAN	CDCA2	17.93676656	1.255225409	4
CD5R2_HUMAN	CDK5R2	18.87497631	1.188494411	4
CDKL3_HUMAN	CDKL3	18.73006528	1.139409369	4
QN1_HUMAN,CE162_HUMAN	CEP162	14.74173859	1.204033342	4
CEP19_HUMAN	CEP19	18.41907647	1.199894865	4
CEP55_HUMAN	CEP55	16.55246256	1.318257877	4
CEP57_HUMAN	CEP57	18.21315554	1.147769782	4
COF1_HUMAN	CFL1	15.64047829	1.222592858	4
COF2_HUMAN	CFL2	17.31704728	1.224305721	4
CING_HUMAN	CGN	17.32870558	1.280833383	4
ACM3_HUMAN	CHRM3	18.61385373	1.31979282	4
ACM4_HUMAN	CHRM4	18.51891406	1.371050375	4
CHUR_HUMAN	CHURC1	18.93753988	1.241320632	4
CISD1_HUMAN	CISD1	18.70033804	1.431930119	4
CTRO_HUMAN	CIT	18.48918925	1.20551836	4
KCRM_HUMAN	CKM	17.87670666	1.383582836	4
CLD1_HUMAN	CLDN1	18.15105595	1.292991713	4
CLD2_HUMAN	CLDN2	18.74422238	1.293603284	4
CLD3_HUMAN	CLDN3	18.51246094	1.292781996	4
CLD4_HUMAN	CLDN4	18.89296279	1.293663056	4
CLD5_HUMAN	CLDN5	18.5149174	1.292826192	4
CLD6_HUMAN	CLDN6	18.89026406	1.294090095	4
CLD8_HUMAN	CLDN8	18.89277688	1.294250339	4
CLIC1_HUMAN	CLIC1	17.46975325	1.253305449	4
CLIC2_HUMAN	CLIC2	18.61302395	1.267607448	4
CLIC4_HUMAN	CLIC4	18.41189473	1.267588358	4
CLIC5_HUMAN	CLIC5	18.32156197	1.267607095	4
EPN4_HUMAN	CLINT1	15.69880611	1.154149954	4
CLIP1_HUMAN	CLIP1	17.17164263	1.401897725	4
CLCA_HUMAN	CLTA	15.71957048	1.19632899	4
CLCB_HUMAN	CLTB	15.38792111	1.154114678	4
CLH1_HUMAN	CLTC	12.80609881	1.415548987	4
CLH2_HUMAN	CLTCL1	16.7579849	1.139578873	4
CNKR2_HUMAN	CNKSR2	17.982201	1.317353892	4
CNN1_HUMAN	CNN1	18.44008065	1.383075843	4
CNR1_HUMAN	CNR1	18.47296243	1.371113452	4
CNST_HUMAN	CNST	18.53881802	1.250883728	4
COBL_HUMAN	COBL	17.06046889	1.246088428	4
COHA1_HUMAN	COL17A1	17.89168528	1.189030212	4
COR1B_HUMAN	CORO1B	17.02372508	1.241063363	4
COR1C_HUMAN	CORO1C	16.83402672	1.242775428	4
COR2A_HUMAN	CORO2A	17.51100538	1.213683719	4
COR2B_HUMAN	CORO2B	18.86101262	1.285384213	4
CBPA6_HUMAN	CPA6	18.80158692	1.278580804	4
CBPM_HUMAN	CPM	17.40377099	1.254454348	4
CPVL_HUMAN	CPVL	17.11674571	1.424275563	4
CRUM2_HUMAN	CRB2	18.71941291	1.231687962	4
RPC9_HUMAN	CRCP	18.32446167	1.351513002	4
CRLF3_HUMAN	CRLF3	17.80952386	1.172522351	4
CROCC_HUMAN	CROCC	18.4302523	1.198562985	4
OCTC_HUMAN	CROT	18.46934008	1.26505479	4
KC1G3_HUMAN	CSNK1G3	18.54914378	1.248825879	4
CSRN1_HUMAN	CSRNP1	18.7450684	1.250697453	4
CSRN2_HUMAN	CSRNP2	18.74326986	1.251889288	4
SRC8_HUMAN	CTTN	15.56398441	1.231915067	4
CYBR1_HUMAN	CYBRD1	17.48630577	1.247342172	4
DAB2_HUMAN	DAB2	15.557233	1.242105453	4
DAPK3_HUMAN	DAPK3	16.83011805	1.221008546	4
DREB_HUMAN	DBN1	12.87796129	1.245520072	4
DCP1A_HUMAN	DCP1A	16.82113373	1.417395647	4
DCP1B_HUMAN	DCP1B	17.55202266	1.417787694	4
DCP2_HUMAN	DCP2	17.09829123	1.417579248	4
DCTN1_HUMAN	DCTN1	15.78665716	1.402029055	4
DCTN2_HUMAN	DCTN2	16.18562233	1.308986745	4
DCTN3_HUMAN	DCTN3	17.69260042	1.307588313	4
DCTN4_HUMAN	DCTN4	17.53639624	1.3088695	4
DCTN5_HUMAN	DCTN5	17.9901796	1.308555816	4
DCTN6_HUMAN	DCTN6	17.69180781	1.308609257	4
DECR2_HUMAN	DECR2	18.37149934	1.128397146	4
DEN1A_HUMAN	DENND1A	17.90866185	1.143139561	4
DEP1B_HUMAN	DEPDC1B	18.80007631	1.292518348	4
DIXC1_HUMAN	DIXDC1	18.08315461	1.221655638	4
DJC14_HUMAN	DNAJC14	18.56544972	1.188147409	4
IDLC_HUMAN	DNALI1	17.75755118	1.272762493	4
DNAS1_HUMAN	DNASE1	18.95458055	1.384473055	4
DOCK6_HUMAN	DOCK6	17.45360938	1.172553057	4
DOCK7_HUMAN	DOCK7	16.243894	1.172503736	4
DOCK8_HUMAN	DOCK8	17.42796324	1.172614454	4
DRD1_HUMAN	DRD1	18.31911443	1.188179577	4
DRD2_HUMAN	DRD2	17.60908359	1.187508233	4
DSC1_HUMAN	DSC1	17.90229748	1.282953695	4
DSG2_HUMAN	DSG2	17.26957605	1.244811595	4
DYST_HUMAN	DST	18.77922979	1.406024013	4
DEST_HUMAN	DSTN	17.90712885	1.224889339	4
E2F7_HUMAN	E2F7	18.40708186	1.41816924	4
EDC3_HUMAN	EDC3	16.95958159	1.417390293	4
EDC4_HUMAN	EDC4	17.07049566	1.417198984	4
EFHD2_HUMAN	EFHD2	18.62329465	1.248391039	4
EHBP1_HUMAN	EHBP1	18.49261801	1.134864711	4
EHD1_HUMAN	EHD1	17.17288862	1.158031121	4
EHD2_HUMAN	EHD2	18.45650324	1.134894514	4
EHD4_HUMAN	EHD4	18.21214756	1.157996102	4
E2AK4_HUMAN	EIF2AK4	17.98343208	1.265008871	4
ELOV1_HUMAN	ELOVL1	18.53755241	1.258853136	4
EPN1_HUMAN	EPN1	16.90796502	1.145678136	4
EPN2_HUMAN	EPN2	18.55427208	1.144589466	4
EPS15_HUMAN	EPS15	15.14411368	1.153674333	4
FA12_HUMAN	F12	18.79765519	1.289981628	4
TF_HUMAN	F3	18.34605414	1.391831988	4
F184A_HUMAN	FAM184A	18.69140078	1.259838769	4
FA71C_HUMAN	FAM71C	18.91542185	1.269329478	4
FA78A_HUMAN	FAM78A	18.8256877	1.193039986	4
FBLI1_HUMAN	FBLIM1	18.34155775	1.247947562	4
FBX15_HUMAN	FBXO15	18.66993438	1.278565888	4
FBX46_HUMAN	FBXO46	17.97106147	1.215316118	4
FCHO2_HUMAN	FCHO2	17.52086117	1.153523608	4
FERM2_HUMAN	FERMT2	18.37529717	1.273192778	4
FLII_HUMAN	FLII	16.54531881	1.227050998	4
FLNA_HUMAN	FLNA	12.4877232	1.243182157	4
FLNB_HUMAN	FLNB	16.41494129	1.247969769	4
FLOT1_HUMAN	FLOT1	16.34375183	1.269015216	4
FLOT2_HUMAN	FLOT2	16.61213231	1.268784923	4
FNDC4_HUMAN	FNDC4	17.79584435	1.278060813	4
FSCN1_HUMAN	FSCN1	17.31521494	1.381456898	4
FSTL3_HUMAN	FSTL3	18.76487663	1.386028251	4
FUZZY_HUMAN	FUZ	18.55402245	1.156671989	4
GAK_HUMAN	GAK	14.76557937	1.142624173	4
GA2L1_HUMAN	GAS2L1	17.0406149	1.176308087	4
GGA2_HUMAN	GGA2	17.37140038	1.125541335	4
GGA3_HUMAN	GGA3	17.49574798	1.12614668	4
GGPPS_HUMAN	GGPS1	18.09939787	1.288543762	4
GGT7_HUMAN	GGT7	18.6222364	1.417964367	4
GHITM_HUMAN	GHITM	17.86903025	1.277992791	4
GIPC1_HUMAN	GIPC1	16.39306225	1.187579996	4
CXA8_HUMAN	GJA8	18.88923875	1.293700522	4
CXB2_HUMAN	GJB2	17.53184886	1.300880313	4
CXD3_HUMAN	GJD3	18.889332	1.293479208	4
GNAI1_HUMAN	GNAI1	15.86179221	1.371081935	4
GNAI3_HUMAN	GNAI3	15.59388444	1.366557449	4
GNAO_HUMAN	GNAO1	16.76214625	1.362442718	4
ALEX_HUMAN	GNAS	16.50298599	1.377682849	4
GNAT2_HUMAN	GNAT2	18.11705904	1.424405619	4
GNAT3_HUMAN	GNAT3	18.66109783	1.371859814	4
GBB1_HUMAN	GNB1	15.85658529	1.366964125	4
GBB2_HUMAN	GNB2	16.2401621	1.37124486	4
GBB3_HUMAN	GNB3	17.57624063	1.371839012	4
GBB4_HUMAN	GNB4	17.0831318	1.372721758	4
GBG10_HUMAN	GNG10	17.92560701	1.371789663	4
GBG11_HUMAN	GNG11	18.37733696	1.366929306	4
GBG12_HUMAN	GNG12	17.79342756	1.372044092	4
GBG13_HUMAN	GNG13	18.29011559	1.371898031	4
GBG2_HUMAN	GNG2	17.31190936	1.371022261	4
GBG3_HUMAN	GNG3	18.29027263	1.371787329	4
GBG4_HUMAN	GNG4	17.79439489	1.371312226	4
GBG5_HUMAN	GNG5	17.57536354	1.371726389	4
GBG7_HUMAN	GNG7	17.94442943	1.371794459	4
GBG8_HUMAN	GNG8	18.47496993	1.371910008	4
GBG1_HUMAN	GNGT1	18.9357502	1.366967816	4
GBGT2_HUMAN	GNGT2	18.53514391	1.371275023	4
GP1BA_HUMAN	GP1BA	17.71431549	1.290024816	4
GPV_HUMAN	GP5	18.79775617	1.290030576	4
GPD1L_HUMAN	GPD1L	18.3802447	1.134046759	4
GPM6B_HUMAN	GPM6B	18.38892401	1.373414764	4
GASP1_HUMAN	GPRASP1	18.28271059	1.322484138	4
RAI3_HUMAN	GPRC5A	17.81071609	1.248613721	4
GPSM1_HUMAN	GPSM1	17.57945091	1.369263831	4
GPSM2_HUMAN	GPSM2	17.55500353	1.363494434	4
GPSM3_HUMAN	GPSM3	18.6609841	1.371055073	4
GRK4_HUMAN	GRK4	18.89787864	1.327425878	4
GRM1_HUMAN	GRM1	18.11870095	1.185983842	4
GRPE1_HUMAN	GRPEL1	18.00275061	1.21056076	4
GELS_HUMAN	GSN	15.78526981	1.245295884	4
TF3A_HUMAN	GTF3A	18.44352142	1.145563621	4
GTSE1_HUMAN	GTSE1	13.93116903	1.14463288	4
GLPC_HUMAN	GYPC	18.57994208	1.295753634	4
GYS2_HUMAN	GYS2	18.53653892	1.266135768	4
H2AV_HUMAN	H2AZ2	18.46839908	1.392022914	4
HDAC8_HUMAN	HDAC8	17.07457245	1.198632301	4
HDGR3_HUMAN	HDGFL3	18.15918038	1.207143988	4
HTR5B_HUMAN	HEATR5B	18.42300038	1.13579142	4
HINT3_HUMAN	HINT3	18.7184396	1.278771949	4
HIP1_HUMAN	HIP1	17.56743948	1.141087892	4
HIP1R_HUMAN	HIP1R	16.99404231	1.165913386	4
5HT1B_HUMAN	HTR1B	17.94929853	1.370996571	4
HUNK_HUMAN	HUNK	18.74496268	1.222706252	4
GILT_HUMAN	IFI30	17.13490856	1.293324911	4
MPRI_HUMAN	IGF2R	17.46879099	1.125716928	4
INF2_HUMAN	INF2	17.00322037	1.249147915	4
IQGA1_HUMAN	IQGAP1	12.72944206	1.243548755	4
IQGA2_HUMAN	IQGAP2	17.55857041	1.32909967	4
IP3KA_HUMAN	ITPKA	18.84871405	1.245622332	4
ITPR3_HUMAN	ITPR3	16.91992477	1.261510574	4
KCNE4_HUMAN	KCNE4	18.91860774	1.240203344	4
KCNF1_HUMAN	KCNF1	18.80078151	1.322447627	4
IRK3_HUMAN,KCNJ3_HUMAN	KCNJ3	18.26823621	1.187528724	4
IRK5_HUMAN,KCNJ5_HUMAN	KCNJ5	18.48110448	1.187442015	4
IRK6_HUMAN,KCNJ6_HUMAN	KCNJ6	18.48932132	1.186304665	4
IRK9_HUMAN,KCNJ9_HUMAN	KCNJ9	18.74083206	1.186271174	4
KCNN2_HUMAN	KCNN2	18.86635214	1.328073753	4
BACD3_HUMAN	KCTD10	17.26728408	1.205989215	4
KIF12_HUMAN	KIF12	18.84561873	1.307148134	4
KI13A_HUMAN	KIF13A	18.26004378	1.136689131	4
KI18A_HUMAN	KIF18A	16.94195588	1.341022613	4
KI18B_HUMAN	KIF18B	18.47523733	1.405733109	4
KBTB5_HUMAN,KLH40_HUMAN	KLHL40	18.64552613	1.325986598	4
KBTBA_HUMAN,KLH41_HUMAN	KLHL41	18.44927884	1.285051109	4
MLL5_HUMAN,KMT2E_HUMAN	KMT2E	17.87061488	1.274422999	4
KXDL1_HUMAN	KXD1	17.77857407	1.199901461	4
KYNU_HUMAN	KYNU	18.71410377	1.343192657	4
SYLM_HUMAN	LARS2	18.64414198	1.134254354	4
LCN15_HUMAN	LCN15	18.4724265	1.206538461	4
ARH_HUMAN	LDLRAP1	17.88901685	1.288278386	4
PPL13_HUMAN	LGALS14	18.91842593	1.240661745	4
LIMA1_HUMAN	LIMA1	13.06997748	1.249101782	4
LIMC1_HUMAN	LIMCH1	17.85718979	1.20798406	4
LMO7_HUMAN	LMO7	17.72335088	1.202760312	4
LMOD3_HUMAN	LMOD3	18.8114077	1.32596701	4
LMTK2_HUMAN	LMTK2	18.23527494	1.25717939	4
LRCH1_HUMAN	LRCH1	18.03123129	1.172999173	4
LRCH2_HUMAN	LRCH2	17.52239354	1.172248905	4
LRCH3_HUMAN	LRCH3	16.79605851	1.172451881	4
LRCH4_HUMAN	LRCH4	18.59990523	1.17174884	4
LRC39_HUMAN	LRRC39	17.75229751	1.22604846	4
LRC45_HUMAN	LRRC45	18.66166632	1.199997575	4
LRRF1_HUMAN	LRRFIP1	18.3779191	1.226888597	4
LRRF2_HUMAN	LRRFIP2	17.42363269	1.227108156	4
LUZP1_HUMAN	LUZP1	16.88899196	1.24435672	4
LYSM2_HUMAN	LYSMD2	17.97891164	1.196939885	4
LZTS2_HUMAN	LZTS2	15.87213582	1.12874051	4
MPRD_HUMAN	M6PR	18.60529009	1.122960874	4
MAF1_HUMAN	MAF1	18.09270434	1.354128847	4
MAGB3_HUMAN	MAGEB3	18.67410243	1.342835863	4
M3K3_HUMAN	MAP3K3	12.84259157	1.332798035	4
MARE1_HUMAN	MAPRE1	13.80618834	1.406150489	4
MARE3_HUMAN	MAPRE3	17.80737474	1.404062229	4
MARF1_HUMAN	MARF1	18.46151991	1.41585933	4
MDM1_HUMAN	MDM1	18.63580186	1.198355837	4
MEA1_HUMAN	MEA1	18.72738459	1.150617917	4
MIB2_HUMAN	MIB2	18.2070944	1.384162216	4
MICA3_HUMAN	MICAL3	17.89323901	1.17779339	4
MIPO1_HUMAN	MIPOL1	18.3748596	1.226032182	4
MMAD_HUMAN	MMADHC	18.44503211	1.307095379	4
MON2_HUMAN	MON2	18.31343446	1.127116082	4
MPC2_HUMAN	MPC2	18.66767506	1.268655543	4
MPRIP_HUMAN	MPRIP	16.25686107	1.218379022	4
MPZL2_HUMAN	MPZL2	18.83491456	1.268535154	4
MPZL3_HUMAN	MPZL3	18.63277522	1.268779515	4
GDF8_HUMAN	MSTN	18.49472295	1.385996249	4
MTER3_HUMAN,MTEF2_HUMAN	MTERF2	18.8151933	1.20711836	4
MTF1_HUMAN	MTF1	18.85756693	1.136325937	4
MTR1B_HUMAN	MTNR1B	15.98600912	1.372679419	4
MYPC3_HUMAN	MYBPC3	18.62599462	1.384640961	4
MYEF2_HUMAN	MYEF2	16.82282365	1.270973543	4
MYH11_HUMAN	MYH11	16.95457319	1.280940801	4
MYH9_HUMAN	MYH9	11.80720473	1.24292354	4
MYL10_HUMAN	MYL10	18.75799819	1.244599094	4
ML12A_HUMAN	MYL12A	17.25536885	1.333413839	4
MYL6_HUMAN	MYL6	16.42453322	1.313328745	4
MYL6B_HUMAN	MYL6B	17.727714	1.205011786	4
MYLK_HUMAN	MYLK	18.13571102	1.231867017	4
MYO10_HUMAN	MYO10	17.88030143	1.119385539	4
MY18A_HUMAN	MYO18A	13.422541	1.215097536	4
MYO19_HUMAN	MYO19	12.96189822	1.24415305	4
MYO1B_HUMAN	MYO1B	16.76451743	1.246788015	4
MYO1C_HUMAN	MYO1C	13.33234374	1.219153228	4
MYO1E_HUMAN	MYO1E	17.30785624	1.237411808	4
MYO5A_HUMAN	MYO5A	16.64938546	1.233678065	4
MYO5B_HUMAN	MYO5B	17.02041193	1.226397378	4
MYO5C_HUMAN	MYO5C	14.6448498	1.234811453	4
MYO6_HUMAN	MYO6	15.67001214	1.162057892	4
MYOM1_HUMAN	MYOM1	18.84348586	1.325795377	4
MYOM2_HUMAN	MYOM2	18.84329176	1.325552678	4
MYOTI_HUMAN	MYOT	18.35899507	1.188772814	4
MYOZ1_HUMAN	MYOZ1	18.08465786	1.385514604	4
MYOZ2_HUMAN	MYOZ2	18.06247445	1.184469616	4
MYOZ3_HUMAN	MYOZ3	18.59786437	1.385408931	4
MYPN_HUMAN	MYPN	18.18785884	1.167141404	4
N4BP3_HUMAN	N4BP3	17.94103001	1.164520191	4
NAGPA_HUMAN	NAGPA	18.46705347	1.154972611	4
NAT14_HUMAN	NAT14	18.25972132	1.432075821	4
NBEL1_HUMAN	NBEAL1	17.97932332	1.137888101	4
NBEL2_HUMAN	NBEAL2	18.11833628	1.1742167	4
NCTR1_HUMAN	NCR1	18.4242588	1.406652047	4
NEBU_HUMAN	NEB	17.80522158	1.325838163	4
NECP1_HUMAN	NECAP1	18.05575433	1.151632536	4
NECP2_HUMAN	NECAP2	17.14601008	1.150840474	4
NFM_HUMAN	NEFM	17.29635633	1.393369968	4
NEXN_HUMAN	NEXN	17.52178084	1.236177427	4
NGB_HUMAN	NGB	18.62716655	1.362459437	4
NRAP_HUMAN	NRAP	18.42342001	1.285284377	4
NT5C_HUMAN	NT5C	18.89963582	1.238437872	4
NUCB1_HUMAN	NUCB1	17.702855	1.361583902	4
NUD12_HUMAN	NUDT12	18.00073231	1.190799995	4
NUD15_HUMAN	NUDT15	18.37573457	1.206626421	4
NUDT3_HUMAN	NUDT3	18.43233572	1.137498177	4
NUMB_HUMAN	NUMB	16.60330881	1.146628862	4
OASL_HUMAN	OASL	18.45050883	1.392465179	4
OAZ2_HUMAN	OAZ2	18.68673914	1.35491548	4
OAZ3_HUMAN	OAZ3	18.60170299	1.355095849	4
OCAD1_HUMAN	OCIAD1	17.12153045	1.424351109	4
OCLN_HUMAN	OCLN	17.96044074	1.293826746	4
OCRL_HUMAN	OCRL	16.59028984	1.148821206	4
DCOR_HUMAN	ODC1	18.31481866	1.355021224	4
OPRD_HUMAN	OPRD1	17.97126874	1.322403215	4
OPRM_HUMAN	OPRM1	17.21646816	1.322477209	4
OR7C1_HUMAN	OR7C1	18.84649013	1.120039058	4
OSTM1_HUMAN	OSTM1	18.00858374	1.366713506	4
OTUD1_HUMAN	OTUD1	18.24886614	1.260682923	4
OVCA2_HUMAN	OVCA2	18.76798964	1.280963364	4
OXA1L_HUMAN	OXA1L	18.40736553	1.431811501	4
OXR1_HUMAN	OXR1	18.57148993	1.219161675	4
P2RY1_HUMAN	P2RY1	18.75391423	1.188246692	4
PACS1_HUMAN	PACS1	17.8396621	1.126159855	4
PACN3_HUMAN	PACSIN3	16.39796038	1.182828765	4
LIS1_HUMAN	PAFAH1B1	16.84069651	1.402049001	4
PA1B2_HUMAN	PAFAH1B2	18.62740079	1.402346352	4
PUR6_HUMAN	PAICS	17.25845559	1.377802759	4
PALLD_HUMAN	PALLD	17.36720156	1.210237173	4
PALM_HUMAN	PALM	18.05093007	1.26253978	4
AKAP2_HUMAN	PALM2AKAP2	17.34953948	1.228244276	4
PATL1_HUMAN	PATL1	18.41048127	1.419817881	4
PCYOX_HUMAN	PCYOX1	18.36180197	1.300547981	4
PCY1B_HUMAN	PCYT1B	18.38805902	1.384856443	4
PDLI1_HUMAN	PDLIM1	17.90931823	1.190734665	4
PDLI7_HUMAN	PDLIM7	14.25134097	1.114983497	4
PDRG1_HUMAN	PDRG1	17.14940447	1.346959295	4
PFD2_HUMAN	PFDN2	16.2373552	1.349287697	4
PFD6_HUMAN	PFDN6	16.93176135	1.344700775	4
PHAR1_HUMAN	PHACTR1	18.74549118	1.384415564	4
PHAR3_HUMAN	PHACTR3	18.92404882	1.250544601	4
PHAR4_HUMAN	PHACTR4	18.1256077	1.257849756	4
SESQ2_HUMAN	PHETA2	18.70986054	1.148793226	4
PHF7_HUMAN	PHF7	18.60469302	1.218747876	4
PHLB2_HUMAN	PHLDB2	17.14473459	1.19540428	4
PICAL_HUMAN	PICALM	16.18660181	1.154278372	4
PIHD1_HUMAN	PIH1D1	15.52982364	1.346553787	4
P3C2A_HUMAN	PIK3C2A	16.28416461	1.179441137	4
PK2L1_HUMAN	PKD2L1	18.70220497	1.199399288	4
PLBL2_HUMAN	PLBD2	18.2003221	1.281142545	4
PLCL2_HUMAN	PLCL2	18.7436933	1.25105895	4
PLEC_HUMAN	PLEC	16.4036486	1.22896381	4
PKHG3_HUMAN	PLEKHG3	17.70364004	1.219532958	4
PKHO2_HUMAN	PLEKHO2	17.48123803	1.259816053	4
PLIN3_HUMAN	PLIN3	17.98035189	1.123010455	4
PNMA3_HUMAN	PNMA3	18.47041456	1.255594887	4
PNRC1_HUMAN	PNRC1	18.46233136	1.353880022	4
POGK_HUMAN	POGK	18.58966449	1.23812984	4
DPOLQ_HUMAN	POLQ	18.88998452	1.150941873	4
RPA1_HUMAN	POLR1A	15.61661393	1.34680543	4
RPAC1_HUMAN	POLR1C	16.14167718	1.352152172	4
RPAC2_HUMAN	POLR1D	17.86676269	1.351771409	4
RPA43_HUMAN	POLR1F	17.94950977	1.352719673	4
RPAB1_HUMAN	POLR2E	15.11712486	1.444050148	4
RPC1_HUMAN	POLR3A	16.8506292	1.35124176	4
RPC2_HUMAN	POLR3B	17.18157293	1.352274683	4
RPC4_HUMAN	POLR3D	17.12586301	1.351633877	4
RPC5_HUMAN	POLR3E	16.02947515	1.350287227	4
RPC6_HUMAN	POLR3F	17.18855535	1.353612345	4
RPC7_HUMAN	POLR3G	18.1993028	1.352014105	4
RPC7L_HUMAN	POLR3GL	18.37544299	1.353400283	4
RPC8_HUMAN	POLR3H	17.19590255	1.351905168	4
RPC10_HUMAN	POLR3K	18.02630278	1.350473185	4
PPE1_HUMAN	PPEF1	18.8645433	1.327565005	4
PPE2_HUMAN	PPEF2	18.86139484	1.327872085	4
PP1A_HUMAN	PPP1CA	12.70945155	1.250912988	4
PP1B_HUMAN	PPP1CB	12.62582011	1.232992921	4
PP1G_HUMAN	PPP1CC	12.82449001	1.252103155	4
PP1RA_HUMAN	PPP1R10	17.6042451	1.278503694	4
PP1RB_HUMAN	PPP1R11	18.23790747	1.280171041	4
MYPT1_HUMAN	PPP1R12A	16.47818539	1.218772453	4
MYPT2_HUMAN	PPP1R12B	17.61700874	1.213107166	4
PP12C_HUMAN	PPP1R12C	18.14679421	1.218215684	4
IASPP_HUMAN	PPP1R13L	17.44676074	1.342674059	4
PP16B_HUMAN	PPP1R16B	18.42397927	1.318094888	4
PPR18_HUMAN	PPP1R18	17.14813275	1.250397245	4
IPP2_HUMAN	PPP1R2	17.61107001	1.257209515	4
PPR21_HUMAN	PPP1R21	17.61192028	1.279066484	4
PPR32_HUMAN	PPP1R32	18.74517411	1.25240268	4
PPR35_HUMAN	PPP1R35	18.35958657	1.417459571	4
PPR37_HUMAN	PPP1R37	18.53666566	1.418484827	4
PPR3B_HUMAN	PPP1R3B	18.46408755	1.252273179	4
PPR3C_HUMAN	PPP1R3C	17.58265225	1.265998898	4
PPR3D_HUMAN	PPP1R3D	18.2372499	1.265980953	4
PPR3E_HUMAN	PPP1R3E	18.92377738	1.250812277	4
PP1R7_HUMAN	PPP1R7	16.34971403	1.342690173	4
NEB1_HUMAN	PPP1R9A	17.2003695	1.251585645	4
NEB2_HUMAN	PPP1R9B	16.65916232	1.2513415	4
PQBP1_HUMAN	PQBP1	17.24293831	1.12889394	4
PRC1_HUMAN	PRC1	17.90009467	1.2922603	4
KPCL_HUMAN	PRKCH	18.51569203	1.293899764	4
KGP1_HUMAN	PRKG1	18.43261323	1.200984302	4
PROM1_HUMAN	PROM1	18.93745046	1.275741561	4
SERC_HUMAN	PSAT1	18.72845761	1.218386216	4
PVR_HUMAN	PVR	17.9467607	1.132268258	4
PYGM_HUMAN	PYGM	18.34590454	1.182870361	4
RAB1A_HUMAN	RAB1A	16.68737049	1.124574504	4
RAB7L_HUMAN	RAB29	18.63102545	1.142790958	4
RAB2A_HUMAN	RAB2A	16.65786353	1.269303835	4
RB33B_HUMAN	RAB33B	18.5821368	1.124717381	4
RABE1_HUMAN	RABEP1	16.93431848	1.124644095	4
RBL2B_HUMAN	RABL2B	18.55252352	1.199795994	4
RAI14_HUMAN	RAI14	16.51408448	1.230354845	4
RALA_HUMAN	RALA	16.32220216	1.318427938	4
RBP1_HUMAN	RALBP1	16.6215594	1.145569062	4
RASD1_HUMAN	RASD1	18.31850173	1.367009489	4
RASEF_HUMAN	RASEF	18.82824723	1.199797155	4
RASLC_HUMAN	RASL12	18.76695291	1.20917864	4
CPZIP_HUMAN	RCSD1	18.91186142	1.259134842	4
REPS1_HUMAN	REPS1	17.73664509	1.145005374	4
REPS2_HUMAN	REPS2	17.85283286	1.145658117	4
RGDSR_HUMAN	RGL4	18.25956005	1.318609195	4
RGPD1_HUMAN	RGPD1	18.77439659	1.347416825	4
RGS10_HUMAN	RGS10	18.06285727	1.371057476	4
RGS16_HUMAN	RGS16	18.15211892	1.36244715	4
RGS18_HUMAN	RGS18	18.45146458	1.371022882	4
RGS19_HUMAN	RGS19	17.93890027	1.366636079	4
RGS20_HUMAN	RGS20	16.96506573	1.362356151	4
RGS4_HUMAN	RGS4	18.0017419	1.362377035	4
RGS5_HUMAN	RGS5	18.36930257	1.366525073	4
RHOB_HUMAN	RHOB	18.22518277	1.205696589	4
RIC8A_HUMAN	RIC8A	17.69101464	1.376829495	4
RIC8B_HUMAN	RIC8B	18.66302954	1.377716047	4
RIPK3_HUMAN	RIPK3	14.21382725	1.366677455	4
RPAP3_HUMAN	RPAP3	15.39574036	1.347288723	4
RAD_HUMAN	RRAD	18.12687548	1.193879975	4
RRBP1_HUMAN	RRBP1	18.18734375	1.225237231	4
RUN3A_HUMAN	RUNDC3A	18.07067717	1.131470628	4
ADSV_HUMAN	SCIN	18.16164167	1.332414499	4
SDC4_HUMAN	SDC4	18.16199286	1.187151228	4
DHSD_HUMAN	SDHD	18.78199714	1.372709891	4
SEC13_HUMAN	SEC13	16.19246126	1.142463745	4
SC16B_HUMAN	SEC16B	18.91478361	1.142433308	4
SERC2_HUMAN	SERINC2	18.25939876	1.277831305	4
SESD1_HUMAN	SESTD1	18.24805193	1.128475209	4
SFRP1_HUMAN	SFRP1	18.23560434	1.254847012	4
SH24A_HUMAN	SH2D4A	17.92905227	1.342046104	4
SH3B4_HUMAN	SH3BP4	17.43393257	1.186727248	4
SH3R2_HUMAN	SH3RF2	18.74707521	1.251787309	4
SIPA1_HUMAN	SIPA1	17.69233628	1.22970112	4
SI1L1_HUMAN	SIPA1L1	17.60138938	1.130032608	4
SI1L3_HUMAN	SIPA1L3	17.51901964	1.217536712	4
GTR3_HUMAN	SLC2A3	18.636383	1.372632016	4
ZNT5_HUMAN	SLC30A5	18.32430924	1.206859613	4
ZNT6_HUMAN	SLC30A6	17.87310062	1.207283431	4
S39A7_HUMAN	SLC39A7	18.17334832	1.360713683	4
XCT_HUMAN	SLC7A11	18.81638617	1.431990024	4
SLTM_HUMAN	SLTM	18.48176931	1.28876209	4
SPSY_HUMAN	SMS	17.63880209	1.343247337	4
SNAI3_HUMAN	SNAI3	18.75601038	1.293208173	4
SNX13_HUMAN	SNX13	18.78434928	1.377673864	4
SNX29_HUMAN	SNX29	18.88456666	1.15550566	4
SRBS2_HUMAN	SORBS2	16.08961097	1.210120194	4
DHSO_HUMAN	SORD	18.06170842	1.202243736	4
LY10L_HUMAN,SP14L_HUMAN	SP140L	18.45391858	1.391518123	4
CYTSB_HUMAN	SPECC1	17.13061003	1.241578385	4
CYTSA_HUMAN	SPECC1L	16.80409649	1.207389447	4
SPTA2_HUMAN,SPTN1_HUMAN	SPTAN1	15.00508769	1.235138304	4
SPTB1_HUMAN	SPTB	18.03515894	1.192390232	4
SPTB2_HUMAN	SPTBN1	15.72981368	1.235699219	4
SPTN2_HUMAN	SPTBN2	17.2452793	1.220049862	4
SSH1_HUMAN	SSH1	18.11687647	1.272095299	4
SSH2_HUMAN	SSH2	17.60879954	1.245799682	4
STABP_HUMAN	STAMBP	16.51482058	1.139545373	4
STALP_HUMAN	STAMBPL1	17.74676779	1.144220077	4
STK35_HUMAN	STK35	18.87355919	1.19069258	4
STON2_HUMAN	STON2	16.64282105	1.157310451	4
SVIL_HUMAN	SVIL	16.37325831	1.243736927	4
SYCE1_HUMAN	SYCE1	18.24527928	1.200522691	4
SYNPO_HUMAN	SYNPO	13.28444409	1.242280156	4
SYNRG_HUMAN	SYNRG	17.63436522	1.135227934	4
SYT2_HUMAN	SYT2	18.58578539	1.157324387	4
TANC2_HUMAN	TANC2	18.22068729	1.252112157	4
TBCK_HUMAN	TBCK	18.67870351	1.279051004	4
TBX6_HUMAN	TBX6	18.36636699	1.123901158	4
TELT_HUMAN	TCAP	17.7248927	1.385539384	4
TES_HUMAN	TES	16.89957119	1.189699295	4
TEX14_HUMAN	TEX14	18.77315932	1.318201313	4
TGON2_HUMAN	TGOLN2	16.45671452	1.133991839	4
TIGD7_HUMAN	TIGD7	18.82223315	1.335219744	4
ZO1_HUMAN	TJP1	15.82215293	1.293536656	4
ZO2_HUMAN	TJP2	16.44660791	1.293349923	4
ZO3_HUMAN	TJP3	18.40509422	1.292973557	4
TM9S2_HUMAN	TM9SF2	18.66450454	1.432255449	4
TM9S4_HUMAN	TM9SF4	16.73452028	1.392138872	4
TM14A_HUMAN	TMEM14A	18.63394026	1.372698577	4
TM177_HUMAN	TMEM177	18.8431947	1.424268992	4
TM222_HUMAN	TMEM222	18.87658027	1.366547271	4
TM230_HUMAN	TMEM230	18.58018614	1.373050627	4
TMOD1_HUMAN	TMOD1	16.57433016	1.226868167	4
TMOD2_HUMAN	TMOD2	18.2426636	1.332411111	4
TMOD3_HUMAN	TMOD3	16.89535117	1.232590625	4
TYB4_HUMAN	TMSB4X	18.23708545	1.386593907	4
BACD2_HUMAN	TNFAIP1	17.02702871	1.205762866	4
TP8L2_HUMAN	TNFAIP8L2	18.76331696	1.189659438	4
TNNC1_HUMAN	TNNC1	18.24282726	1.199535709	4
TNNI1_HUMAN	TNNI1	18.38053506	1.199412073	4
TNNI2_HUMAN	TNNI2	18.56693189	1.199531565	4
TNNT1_HUMAN	TNNT1	17.77513782	1.200337341	4
TNNT2_HUMAN	TNNT2	18.32963242	1.199581147	4
TOM1_HUMAN	TOM1	18.27366557	1.161995013	4
TOX4_HUMAN	TOX4	17.34633128	1.278606065	4
TPBG_HUMAN	TPBG	18.90810647	1.187752739	4
TPM1_HUMAN	TPM1	16.19925974	1.200427905	4
TPM2_HUMAN	TPM2	16.74118715	1.193641246	4
TPM3_HUMAN	TPM3	16.19051143	1.200362759	4
TPM4_HUMAN	TPM4	16.88099314	1.198785279	4
[truncated: 11,077 more rows]
