# Supplementary material for: Analysis of Huntington’s Disease Modifiers Using the Hyperbolic Mapping of the Protein Interaction Network
Source: Int J Mol Sci. 2022 May 23;23(10):5853. doi: 10.3390/ijms23105853 (PMC9144261; doi:10.3390/ijms23105853)
Supplement: Supplementary file 1 [file ijms-23-05853-s001.zip › Supplementary Table S2.csv]

Ηtt interactor UniprotKB	Htt interactor Symbol	Cluster
TBA1A_HUMAN	TUBA1A	1
L2GL1_HUMAN	LLGL1	1
ATG5_HUMAN	ATG5	1
WDFY3_HUMAN	WDFY3	1
MLP3B_HUMAN	MAP1LC3B	1
NBR1_HUMAN	NBR1	1
ULK1_HUMAN	ULK1	1
ECHA_HUMAN	HADHA	1
PIBF1_HUMAN	PIBF1	1
ZMAT2_HUMAN	ZMAT2	1
SRGP1_HUMAN	SRGAP1	1
MORC3_HUMAN	MORC3	1
IFT20_HUMAN	IFT20	1
RAB3D_HUMAN	RAB3D	1
RB11A_HUMAN	RAB11A	1
OPTN_HUMAN	OPTN	1
TPH1_HUMAN	TPH1	1
E41L3_HUMAN	EPB41L3	1
CLAP1_HUMAN	CLASP1	1
1433G_HUMAN	YWHAG	1
DOC11_HUMAN	DOCK11	1
1433B_HUMAN	YWHAB	1
UBP8_HUMAN	USP8	1
KIF23_HUMAN	KIF23	1
PARD3_HUMAN	PARD3	1
MOG_HUMAN	MOG	1
ETFB_HUMAN	ETFB	1
TKT_HUMAN	TKT	1
CUL2_HUMAN	CUL2	1
CUL5_HUMAN	CUL5	1
FEM1B_HUMAN	FEM1B	1
RCN2_HUMAN	RCN2	1
DNJA1_HUMAN	DNAJA1	1
EAA2_HUMAN	SLC1A2	1
TBG1_HUMAN	TUBG1	1
SFXN3_HUMAN	SFXN3	1
DPYL1_HUMAN	CRMP1	1
DPYL2_HUMAN	DPYSL2	1
GPM6A_HUMAN	GPM6A	1
CC126_HUMAN	CCDC126	1
LSAMP_HUMAN	LSAMP	1
SYN2_HUMAN	SYN2	1
SYUA_HUMAN	SNCA	1
HCD2_HUMAN	HSD17B10	1
SNX21_HUMAN	SNX21	1
DNJB1_HUMAN	DNAJB1	1
STIP1_HUMAN	STIP1	1
LDH6A_HUMAN	LDHAL6A	1
HSP7C_HUMAN	HSPA8	1
HS90A_HUMAN	HSP90AA1	1
AGO2_HUMAN	AGO2	1
HS90B_HUMAN	HSP90AB1	1
GAGD4_HUMAN	XAGE3	1
G3P_HUMAN	GAPDH	1
ALDOA_HUMAN	ALDOA	1
ALDOC_HUMAN	ALDOC	1
TRAD1_HUMAN	TRAFD1	1
MYPR_HUMAN	PLP1	1
KPYM_HUMAN	PKM	1
BAG3_HUMAN	BAG3	1
MDHC_HUMAN	MDH1	1
TPIS_HUMAN	TPI1	1
EF1D_HUMAN	EEF1D	1
ERC6L_HUMAN	ERCC6L	1
ENOB_HUMAN	ENO3	1
LDHA_HUMAN	LDHA	1
LDHB_HUMAN	LDHB	1
XRCC6_HUMAN	XRCC6	1
E41L1_HUMAN	EPB41L1	1
CAD13_HUMAN	CDH13	1
STX1B_HUMAN	STX1B	1
STXB1_HUMAN	STXBP1	1
STX1A_HUMAN	STX1A	1
SC6A1_HUMAN	SLC6A1	1
SYPH_HUMAN	SYP	1
SNAB_HUMAN	NAPB	1
SYT1_HUMAN	SYT1	1
DJC21_HUMAN	DNAJC21	1
CA2D1_HUMAN	CACNA2D1	2
SYVN1_HUMAN	SYVN1	2
ITPR1_HUMAN	ITPR1	2
SEPT7_HUMAN	SEPTIN7	2
ASPH_HUMAN	ASPH	2
ATG12_HUMAN	ATG12	2
WAC_HUMAN	WAC	2
ZDH17_HUMAN	ZDHHC17	2
UT14A_HUMAN	UTP14A	2
SYMPK_HUMAN	SYMPK	2
SETD2_HUMAN	SETD2	2
TPR_HUMAN	TPR	2
NUPL1_HUMAN	NUP58	2
CISY_HUMAN	CS	2
NUB1_HUMAN	NUB1	2
LDOC1_HUMAN	LDOC1	3
PGES2_HUMAN	PTGES2	3
ODF2L_HUMAN	ODF2L	3
SRGP3_HUMAN	SRGAP3	3
HBB_HUMAN	HBB	3
MRE11_HUMAN	MRE11	3
GFAP_HUMAN	GFAP	3
RFXK_HUMAN	RFXANK	3
PEPL_HUMAN	PPL	3
CHM4B_HUMAN	CHMP4B	3
JKIP1_HUMAN	JAKMIP1	3
SNP25_HUMAN	SNAP25	3
ZNF91_HUMAN	ZNF91	3
GRDN_HUMAN	CCDC88A	3
GGA2_HUMAN	GGA2	3
PQBP1_HUMAN	PQBP1	3
HIP1_HUMAN	HIP1	3
AP2A2_HUMAN	AP2A2	3
SYT2_HUMAN	SYT2	3
ACADL_HUMAN	ACADL	3
HIP1R_HUMAN	HIP1R	3
GRM1_HUMAN	GRM1	3
ADDG_HUMAN	ADD3	3
SPTA2_HUMAN	SPTAN1	3
RHG24_HUMAN	ARHGAP24	3
BASP1_HUMAN	BASP1	3
PALM_HUMAN	PALM	3
IDLC_HUMAN	DNALI1	3
41_HUMAN	EPB41	3
DCTN2_HUMAN	DCTN2	3
OPRM_HUMAN	OPRM1	3
GNAO_HUMAN	GNAO1	3
GBB1_HUMAN	GNB1	3
GBB2_HUMAN	GNB2	3
KCRM_HUMAN	CKM	3
CD59_HUMAN	CD59	3
CLH1_HUMAN	CLTC	3
MKRN2_HUMAN	MKRN2	4
IKKB_HUMAN	IKBKB	4
TANK_HUMAN	TANK	4
CX6A1_HUMAN	COX6A1	4
ECH1_HUMAN	ECH1	4
CHCH2_HUMAN	CHCHD2	4
CEP63_HUMAN	CEP63	4
PSB7_HUMAN	PSMB7	5
PSMD4_HUMAN	PSMD4	5
UBP14_HUMAN	USP14	5
UBQL2_HUMAN	UBQLN2	5
A16L1_HUMAN	ATG16L1	5
DYN2_HUMAN	DNM2	5
WBP4_HUMAN	WBP4	6
TCRG1_HUMAN	TCERG1	6
MEOX1_HUMAN	MEOX1	6
LC7L2_HUMAN	LUC7L2	6
HNRPC_HUMAN	HNRNPC	6
REN3A_HUMAN	UPF3A	6
API5_HUMAN	API5	6
IMA3_HUMAN	KPNA4	6
COPB_HUMAN	COPB1	6
SPG20_HUMAN	SPART	6
TRAF6_HUMAN	TRAF6	6
ZN675_HUMAN	ZNF675	6
SUMO1_HUMAN	SUMO1	6
TBB5_HUMAN	TUBB	7
MLP3A_HUMAN	MAP1LC3A	7
RHG25_HUMAN	ARHGAP25	7
FNBP2_HUMAN	SRGAP2	7
I17RA_HUMAN	IL17RA	7
ENOA_HUMAN	ENO1	7
MAGB6_HUMAN	MAGEB6	7
PPBT_HUMAN	ALPL	7
PRS8_HUMAN	PSMC5	7
ATPO_HUMAN	ATP5PO	7
ATPD_HUMAN	ATP5F1D	7
F179B_HUMAN	TOGARAM1	8
HNRPL_HUMAN	HNRNPL	9
DYHC1_HUMAN	DYNC1H1	9
CAH4_HUMAN	CA4	9
COX5A_HUMAN	COX5A	9
RL4_HUMAN	RPL4	10
BZW2_HUMAN	BZW2	10
HBS1L_HUMAN	HBS1L	10
SRP09_HUMAN	SRP9	10
ZC3H1_HUMAN	ZFC3H1	10
TSH3_HUMAN	TSHZ3	10
CENPV_HUMAN	CENPV	10
EM55_HUMAN	MPP1	11
TERA_HUMAN	VCP	12
ELP1_HUMAN	ELP1	12
MED21_HUMAN	MED21	12
MED15_HUMAN	MED15	12
MED31_HUMAN	MED31	12
SPT5H_HUMAN	SUPT5H	12
CN37_HUMAN	CNP	12
CMC1_HUMAN	SLC25A12	12
AKP8L_HUMAN	AKAP8L	12
ING5_HUMAN	ING5	12
NEMO_HUMAN	IKBKG	12
PP2AA_HUMAN	PPP2CA	12
FRIL_HUMAN	FTL	12
GASP2_HUMAN	GPRASP2	12
IKKA_HUMAN	CHUK	13
AKT1_HUMAN	AKT1	13
UB2E3_HUMAN	UBE2E3	13
UBE2K_HUMAN	UBE2K	13
TRI18_HUMAN	MID1	13
SIAH1_HUMAN	SIAH1	13
RPGF2_HUMAN	RAPGEF2	13
MAGBI_HUMAN	MAGEB18	13
RABX5_HUMAN	RABGEF1	13
ZFY19_HUMAN	ZFYVE19	13
BRE1B_HUMAN	RNF40	13
MTOR_HUMAN	MTOR	13
KS6B1_HUMAN	RPS6KB1	13
NEGR1_HUMAN	NEGR1	13
AMFR1_HUMAN	AMFR	13
HUWE1_HUMAN	HUWE1	13
P4HA1_HUMAN	P4HA1	13
DLDH_HUMAN	DLD	13
TACC1_HUMAN	TACC1	13
MOFA1_HUMAN	MRFAP1	13
MR1L1_HUMAN	MRFAP1L1	13
TGM2_HUMAN	TGM2	13
TBP_HUMAN	TBP	14
GLP3L_HUMAN	GOLPH3L	14
ANM2_HUMAN	PRMT2	14
UBAC1_HUMAN	UBAC1	14
SRRT_HUMAN	SRRT	14
ZN451_HUMAN	ZNF451	14
PR40A_HUMAN	PRPF40A	14
PR40B_HUMAN	PRPF40B	14
AXIN1_HUMAN	AXIN1	14
USP9X_HUMAN	USP9X	14
ITCH_HUMAN	ITCH	14
TAF4_HUMAN	TAF4	14
P53_HUMAN	TP53	14
CTNB1_HUMAN	CTNNB1	14
PIAS1_HUMAN	PIAS1	14
SP3_HUMAN	SP3	14
NDF1_HUMAN	NEUROD1	14
KAT2B_HUMAN	KAT2B	14
CBP_HUMAN	CREBBP	14
SRBP2_HUMAN	SREBF2	14
SP1_HUMAN	SP1	14
MBD1_HUMAN	MBD1	14
PIAS4_HUMAN	PIAS4	14
DOCK9_HUMAN	DOCK9	14
ETV4_HUMAN	ETV4	14
TPP1_HUMAN	TPP1	14
PPARG_HUMAN	PPARG	14
NPY2R_HUMAN	NPY2R	14
NFKB1_HUMAN	NFKB1	14
HMGB1_HUMAN	HMGB1	14
MGRN1_HUMAN	MGRN1	14
CREB1_HUMAN	CREB1	14
MEF2D_HUMAN	MEF2D	14
PML_HUMAN	PML	14
ZN133_HUMAN	ZNF133	14
HMGA1_HUMAN	HMGA1	14
DUS10_HUMAN	DUSP10	14
TXD11_HUMAN	TXNDC11	14
CTBP1_HUMAN	CTBP1	14
BRE1A_HUMAN	RNF20	15
TCPQ_HUMAN	CCT8	15
TCPZ_HUMAN	CCT6A	15
SASH1_HUMAN	SASH1	15
ZBT16_HUMAN	ZBTB16	16
REST_HUMAN	REST	16
HEY2_HUMAN	HEY2	16
NCOR1_HUMAN	NCOR1	16
SAP30_HUMAN	SAP30	16
SIN3A_HUMAN	SIN3A	16
KLF11_HUMAN	KLF11	16
BAZ1A_HUMAN	BAZ1A	16
HYPK_HUMAN	HYPK	16
COX2_HUMAN	COX2	16
PTRF_HUMAN	CAVIN1	16
VDAC3_HUMAN	VDAC3	16
VDAC2_HUMAN	VDAC2	16
VDAC1_HUMAN	VDAC1	16
IMMT_HUMAN	IMMT	16
CHCH3_HUMAN	CHCHD3	16
DJC11_HUMAN	DNAJC11	16
MTX2_HUMAN	MTX2	16
QCR1_HUMAN	UQCRC1	16
QCR2_HUMAN	UQCRC2	16
COX5B_HUMAN	COX5B	16
MACOI_HUMAN	MACO1	16
PHB2_HUMAN	PHB2	16
COX3_HUMAN	COX3	16
CY1_HUMAN	CYC1	16
QCR6_HUMAN	UQCRH	16
CX6B1_HUMAN	COX6B1	16
COX6C_HUMAN	COX6C	16
NDUV2_HUMAN	NDUFV2	16
NDUA9_HUMAN	NDUFA9	16
NDUV1_HUMAN	NDUFV1	16
NDUA8_HUMAN	NDUFA8	16
NDUB9_HUMAN	NDUFB9	16
NDUBA_HUMAN	NDUFB10	16
NDUS1_HUMAN	NDUFS1	16
NDUS3_HUMAN	NDUFS3	16
NDUS5_HUMAN	NDUFS5	16
NDUAD_HUMAN	NDUFA13	16
IPYR2_HUMAN	PPA2	16
PDK2_HUMAN	PDK2	16
ODP2_HUMAN	DLAT	16
ODO2_HUMAN	DLST	16
MBD4_HUMAN	MBD4	16
M2OM_HUMAN	SLC25A11	16
HEYL_HUMAN	HEYL	16
PKCB1_HUMAN	ZMYND8	16
HM20A_HUMAN	HMG20A	16
EHMT1_HUMAN	EHMT1	16
H31_HUMAN	H3C1	16
CHD3_HUMAN	CHD3	16
HXC4_HUMAN	HOXC4	16
DDB1_HUMAN	DDB1	16
MTSS1_HUMAN	MTSS1	16
MTUS1_HUMAN	MTUS1	16
MIPEP_HUMAN	MIPEP	16
NDKM_HUMAN	NME4	16
TF3C3_HUMAN	GTF3C3	17
DNJA3_HUMAN	DNAJA3	17
RAC1_HUMAN	RAC1	17
PAR6A_HUMAN	PARD6A	17
OSTF1_HUMAN	OSTF1	17
GNAZ_HUMAN	GNAZ	17
CNTN1_HUMAN	CNTN1	17
DPPA4_HUMAN	DPPA4	17
CIP4_HUMAN	TRIP10	17
THY1_HUMAN	THY1	17
FNBP4_HUMAN	FNBP4	17
ZN655_HUMAN	ZNF655	17
GRAP_HUMAN	GRAP	17
SHPS1_HUMAN	SIRPA	17
P85A_HUMAN	PIK3R1	17
P85B_HUMAN	PIK3R2	17
P55G_HUMAN	PIK3R3	17
PTK6_HUMAN	PTK6	17
RASA1_HUMAN	RASA1	17
EGFR_HUMAN	EGFR	17
DNJC4_HUMAN	DNAJC4	17
JPH2_HUMAN	JPH2	17
PAK2_HUMAN	PAK2	17
BAIP2_HUMAN	BAIAP2	17
PROF2_HUMAN	PFN2	17
EVL_HUMAN	EVL	17
AT1B1_HUMAN	ATP1B1	17
GIT1_HUMAN	GIT1	17
SH3G3_HUMAN	SH3GL3	17
CBS_HUMAN	CBS	17
HAP1_HUMAN	HAP1	17
K1377_HUMAN	CEP126	17
HD_HUMAN	HTT	17
FICD_HUMAN	FICD	17
F8I2_HUMAN	F8A1	17
MAGA3_HUMAN	MAGEA3	17
HYPM_HUMAN	H2AP	17
FEZ1_HUMAN	FEZ1	17
PACN1_HUMAN	PACSIN1	17
1B07_HUMAN	HLA-B	17
SRBS1_HUMAN	SORBS1	17
CD36_HUMAN	CD36	17
OPCM_HUMAN	OPCML	17
NTRI_HUMAN	NTM	17
MPCP_HUMAN	SLC25A3	17
GRB2_HUMAN	GRB2	17
EZRI_HUMAN	EZR	17
DLG4_HUMAN	DLG4	17
UBQL1_HUMAN	UBQLN1	17
RHEB_HUMAN	RHEB	17
M3K10_HUMAN	MAP3K10	17
CH60_HUMAN	HSPD1	17
LANC1_HUMAN	LANCL1	17
SHLB1_HUMAN	SH3GLB1	17
DYN1_HUMAN	DNM1	17
HAX1_HUMAN	HAX1	17
CASP6_HUMAN	CASP6	17
CASP3_HUMAN	CASP3	17
BAP31_HUMAN	BCAP31	17
BECN1_HUMAN	BECN1	17
APBB2_HUMAN	APBB2	17
ARFG3_HUMAN	ARFGAP3	17
CASP1_HUMAN	CASP1	17
SQSTM_HUMAN	SQSTM1	17
FBN2_HUMAN	FBN2	17
MK03_HUMAN	MAPK3	17
PX11B_HUMAN	PEX11B	17
