# Supplementary material for: Analysis of Huntington’s Disease Modifiers Using the Hyperbolic Mapping of the Protein Interaction Network
Source: Int J Mol Sci. 2022 May 23;23(10):5853. doi: 10.3390/ijms23105853 (PMC9144261; doi:10.3390/ijms23105853)
Supplement: Supplementary file 1 [file ijms-23-05853-s001.zip › Supplementary Table S3.csv]

Interactor UniprotKB	Interactor Symbol	Cluster interactor	Paralog UniprotKB	Paralog Symbol	Cluster paralog
1433G_HUMAN	YWHAG	1	1433B_HUMAN	YWHAB	1
ALDOC_HUMAN	ALDOC	1	ALDOA_HUMAN	ALDOA	1
CUL5_HUMAN	CUL5	1	CUL2_HUMAN	CUL2	1
DPYL2_HUMAN	DPYSL2	1	DPYL1_HUMAN	CRMP1	1
E41L3_HUMAN	EPB41L3	1	E41L1_HUMAN	EPB41L1	1
MYPR_HUMAN	PLP1	1	GPM6A_HUMAN	GPM6A	1
HS90B_HUMAN	HSP90AB1	1	HS90A_HUMAN	HSP90AA1	1
LDHA_HUMAN	LDHA	1	LDH6A_HUMAN	LDHAL6A	1
LDHB_HUMAN	LDHB	1	LDH6A_HUMAN	LDHAL6A	1
LDHB_HUMAN	LDHB	1	LDHA_HUMAN	LDHA	1
RB11A_HUMAN	RAB11A	1	RAB3D_HUMAN	RAB3D	1
STX1B_HUMAN	STX1B	1	STX1A_HUMAN	STX1A	1
TBG1_HUMAN	TUBG1	1	TBA1A_HUMAN	TUBA1A	1
E41L3_HUMAN	EPB41L3	1	41_HUMAN	EPB41	3
E41L1_HUMAN	EPB41L1	1	41_HUMAN	EPB41	3
UBP8_HUMAN	USP8	1	UBP14_HUMAN	USP14	5
ENOB_HUMAN	ENO3	1	ENOA_HUMAN	ENO1	7
MLP3B_HUMAN	MAP1LC3B	1	MLP3A_HUMAN	MAP1LC3A	7
TBG1_HUMAN	TUBG1	1	TBB5_HUMAN	TUBB	7
OPTN_HUMAN	OPTN	1	NEMO_HUMAN	IKBKG	12
ERC6L_HUMAN	ERCC6L	1	CHD3_HUMAN	CHD3	16
DJC21_HUMAN	DNAJC21	1	DJC11_HUMAN	DNAJC11	16
SETD2_HUMAN	SETD2	2	EHMT1_HUMAN	EHMT1	16
SRGP3_HUMAN	SRGAP3	3	SRGP1_HUMAN	SRGAP1	1
SYT2_HUMAN	SYT2	3	SYT1_HUMAN	SYT1	1
GBB2_HUMAN	GNB2	3	GBB1_HUMAN	GNB1	3
HIP1R_HUMAN	HIP1R	3	HIP1_HUMAN	HIP1	3
ZNF91_HUMAN	ZNF91	3	ZN675_HUMAN	ZNF675	6
IKKB_HUMAN	IKBKB	4	IKKA_HUMAN	CHUK	13
DYN2_HUMAN	DNM2	5	DYN1_HUMAN	DNM1	17
UBQL2_HUMAN	UBQLN2	5	UBQL1_HUMAN	UBQLN1	17
SRGP2_HUMAN	SRGAP2	7	SRGP1_HUMAN	SRGAP1	1
TBB5_HUMAN	TUBB	7	TBA1A_HUMAN	TUBA1A	1
RHG25_HUMAN	ARHGAP25	7	RHG24_HUMAN	ARHGAP24	3
SRGP2_HUMAN	SRGAP2	7	SRGP3_HUMAN	SRGAP3	3
MAGB6_HUMAN	MAGEB6	7	MAGA3_HUMAN	MAGEA3	17
F179B_HUMAN	TOGARAM1	8	CLAP1_HUMAN	CLASP1	1
HNRPL_HUMAN	HNRNPL	9	ECH1_HUMAN	ECH1	4
NEGR1_HUMAN	NEGR1	13	LSAMP_HUMAN	LSAMP	1
AMFR_HUMAN	AMFR	13	SYVN1_HUMAN	SYVN1	2
MAGBI_HUMAN	MAGEB18	13	MAGB6_HUMAN	MAGEB6	7
MR1L1_HUMAN	MRFAP1L1	13	MOFA1_HUMAN	MRFAP1	13
TRI18_HUMAN	MID1	13	PML_HUMAN	PML	14
BRE1B_HUMAN	RNF40	13	BRE1A_HUMAN	RNF20	15
MAGBI_HUMAN	MAGEB18	13	MAGA3_HUMAN	MAGEA3	17
DOCK9_HUMAN	DOCK9	14	DOC11_HUMAN	DOCK11	1
USP9X_HUMAN	USP9X	14	UBP8_HUMAN	USP8	1
USP9X_HUMAN	USP9X	14	UBP14_HUMAN	USP14	5
ITCH_HUMAN	ITCH	14	HUWE1_HUMAN	HUWE1	13
PIAS4_HUMAN	PIAS4	14	PIAS1_HUMAN	PIAS1	14
PR40B_HUMAN	PRPF40B	14	PR40A_HUMAN	PRPF40A	14
SP3_HUMAN	SP3	14	SP1_HUMAN	SP1	14
KAT2B_HUMAN	KAT2B	14	BAZ1A_HUMAN	BAZ1A	16
HMGB1_HUMAN	HMGB1	14	HM20A_HUMAN	HMG20A	16
ZN451_HUMAN	ZNF451	14	ZBT16_HUMAN	ZBTB16	16
TCPZ_HUMAN	CCT6A	15	TCPQ_HUMAN	CCT8	15
TCPQ_HUMAN	CCT8	15	CH60_HUMAN	HSPD1	17
TCPZ_HUMAN	CCT6A	15	CH60_HUMAN	HSPD1	17
M2OM_HUMAN	SLC25A11	16	CMC1_HUMAN	SLC25A12	12
HEYL_HUMAN	HEYL	16	HEY2_HUMAN	HEY2	16
ODP2_HUMAN	DLAT	16	ODO2_HUMAN	DLST	16
QCR2_HUMAN	UQCRC2	16	QCR1_HUMAN	UQCRC1	16
VDAC2_HUMAN	VDAC2	16	VDAC1_HUMAN	VDAC1	16
VDAC3_HUMAN	VDAC3	16	VDAC1_HUMAN	VDAC1	16
VDAC3_HUMAN	VDAC3	16	VDAC2_HUMAN	VDAC2	16
DNJC4_HUMAN	DNAJC4	17	DJC21_HUMAN	DNAJC21	1
DNJA3_HUMAN	DNAJA3	17	DNJA1_HUMAN	DNAJA1	1
OPCM_HUMAN	OPCML	17	LSAMP_HUMAN	LSAMP	1
NTRI_HUMAN	NTM	17	LSAMP_HUMAN	LSAMP	1
GNAZ_HUMAN	GNAZ	17	GNAO_HUMAN	GNAO1	3
MPCP_HUMAN	SLC25A3	17	CMC1_HUMAN	SLC25A12	12
NTRI_HUMAN	NTM	17	NEGR1_HUMAN	NEGR1	13
OPCM_HUMAN	OPCML	17	NEGR1_HUMAN	NEGR1	13
DNJC4_HUMAN	DNAJC4	17	DJC11_HUMAN	DNAJC11	16
MPCP_HUMAN	SLC25A3	17	M2OM_HUMAN	SLC25A11	16
GIT1_HUMAN	GIT1	17	ARFG3_HUMAN	ARFGAP3	17
CASP6_HUMAN	CASP6	17	CASP1_HUMAN	CASP1	17
CASP3_HUMAN	CASP3	17	CASP1_HUMAN	CASP1	17
CASP6_HUMAN	CASP6	17	CASP3_HUMAN	CASP3	17
GRB2_HUMAN	GRB2	17	GRAP_HUMAN	GRAP	17
OPCM_HUMAN	OPCML	17	NTRI_HUMAN	NTM	17
P85A_HUMAN	PIK3R1	17	P55G_HUMAN	PIK3R3	17
P85B_HUMAN	PIK3R2	17	P55G_HUMAN	PIK3R3	17
P85B_HUMAN	PIK3R2	17	P85A_HUMAN	PIK3R1	17
SRBS1_HUMAN	SORBS1	17	SH3G3_HUMAN	SH3GL3	17
SHLB1_HUMAN	SH3GLB1	17	SH3G3_HUMAN	SH3GL3	17
SRBS1_HUMAN	SORBS1	17	SHLB1_HUMAN	SH3GLB1	17
