# Supplementary material for: Analysis of Huntington’s Disease Modifiers Using the Hyperbolic Mapping of the Protein Interaction Network
Source: Int J Mol Sci. 2022 May 23;23(10):5853. doi: 10.3390/ijms23105853 (PMC9144261; doi:10.3390/ijms23105853)
Supplement: Supplementary file 1 [file ijms-23-05853-s001.zip › Supplementary Table S4.csv]

Interactor UniprotKB	Interactor Symbol	Cluster interactor	Role interactor	References role interactor	Paralog UniprotKB	Paralog Symbol	Cluster paralog	Role paralog	References role paralog
IKKB_HUMAN	IKBKB	4	negative	PMID: 19488402	IKKA_HUMAN	CHUK	13	positive	PMID: 19488402
TBB5_HUMAN	TUBB	7	negative	PMID: 19628478	TBA1A_HUMAN	TUBA1A	1	not known
TRI18_HUMAN	MID1	13	negative	PMID: 34659371,PMID: 23443539	PML_HUMAN	PML	14	positive	PMID: 24882209
TBG1_HUMAN	TUBG1	1	not known		TBB5_HUMAN	TUBB	7	negative	PMID: 19628478
E41L3_HUMAN	EPB41L3	1	not known		41_HUMAN	EPB41	3	not known
E41L1_HUMAN	EPB41L1	1	not known		41_HUMAN	EPB41	3	not known
ENOB_HUMAN	ENO3	1	not known		ENOA_HUMAN	ENO1	7	not known
ERC6L_HUMAN	ERCC6L	1	not known		CHD3_HUMAN	CHD3	16	not known
SETD2_HUMAN	SETD2	2	not known		EHMT1_HUMAN	EHMT1	16	not known
SRGP3_HUMAN	SRGAP3	3	not known		SRGP1_HUMAN	SRGAP1	1	not known
SYT2_HUMAN	SYT2	3	not known		SYT1_HUMAN	SYT1	1	not known
ZNF91_HUMAN	ZNF91	3	not known		ZN675_HUMAN	ZNF675	6	not known
DYN2_HUMAN	DNM2	5	not known		DYN1_HUMAN	DNM1	17	not known
SRGP2_HUMAN	SRGAP2	7	not known		SRGP1_HUMAN	SRGAP1	1	not known
RHG25_HUMAN	ARHGAP25	7	not known		RHG24_HUMAN	ARHGAP24	3	not known
SRGP2_HUMAN	SRGAP2	7	not known		SRGP3_HUMAN	SRGAP3	3	not known
MAGB6_HUMAN	MAGEB6	7	not known		MAGA3_HUMAN	MAGEA3	17	not known
F179B_HUMAN	TOGARAM1	8	not known		CLAP1_HUMAN	CLASP1	1	not known
HNRPL_HUMAN	HNRNPL	9	not known		ECH1_HUMAN	ECH1	4	not known
NEGR1_HUMAN	NEGR1	13	not known		LSAMP_HUMAN	LSAMP	1	not known
MAGBI_HUMAN	MAGEB18	13	not known		MAGB6_HUMAN	MAGEB6	7	not known
BRE1B_HUMAN	RNF40	13	not known		BRE1A_HUMAN	RNF20	15	not known
MAGBI_HUMAN	MAGEB18	13	not known		MAGA3_HUMAN	MAGEA3	17	not known
DOCK9_HUMAN	DOCK9	14	not known		DOC11_HUMAN	DOCK11	1	not known
USP9X_HUMAN	USP9X	14	not known		UBP8_HUMAN	USP8	1	not known
ITCH_HUMAN	ITCH	14	not known		HUWE1_HUMAN	HUWE1	13	not known
KAT2B_HUMAN	KAT2B	14	not known		BAZ1A_HUMAN	BAZ1A	16	not known
ZN451_HUMAN	ZNF451	14	not known		ZBT16_HUMAN	ZBTB16	16	not known
M2OM_HUMAN	SLC25A11	16	not known		CMC1_HUMAN	SLC25A12	12	not known
OPCM_HUMAN	OPCML	17	not known		LSAMP_HUMAN	LSAMP	1	not known
NTRI_HUMAN	NTM	17	not known		LSAMP_HUMAN	LSAMP	1	not known
GNAZ_HUMAN	GNAZ	17	not known		GNAO_HUMAN	GNAO1	3	not known
NTRI_HUMAN	NTM	17	not known		NEGR1_HUMAN	NEGR1	13	not known
OPCM_HUMAN	OPCML	17	not known		NEGR1_HUMAN	NEGR1	13	not known
MPCP_HUMAN	SLC25A3	17	not known		CMC1_HUMAN	SLC25A12	12	not known
MPCP_HUMAN	SLC25A3	17	not known		M2OM_HUMAN	SLC25A11	16	not known
UBP8_HUMAN	USP8	1	not known		UBP14_HUMAN	USP14	5	positive	PMID: 24951540
USP9X_HUMAN	USP9X	14	not known		UBP14_HUMAN	USP14	5	positive	PMID: 24951541
HMGB1_HUMAN	HMGB1	14	positive	PMID: 23303669,PMID: 17384639	HM20A_HUMAN	HMG20A	16	not known
TCPQ_HUMAN	CCT8	15	positive	PMID: 26900923	CH60_HUMAN	HSPD1	17	not known
DJC21_HUMAN	DNAJC21	1	positive	PMID: 10575031	DJC11_HUMAN	DNAJC11	16	positive	PMID: 10575031
DNJC4_HUMAN	DNAJC4	17	positive	PMID: 10575031	DJC21_HUMAN	DNAJC21	1	positive	PMID: 10575031
DNJA3_HUMAN	DNAJA3	17	positive	PMID: 10575032	DNJA1_HUMAN	DNAJA1	1	positive	PMID: 10575032,PMID: 32424160
DNJC4_HUMAN	DNAJC4	17	positive	PMID: 10575033	DJC11_HUMAN	DNAJC11	16	positive	PMID: 10575033
OPTN_HUMAN	OPTN	1	positive	PMID: 16091361,PMID: 25484089	NEMO_HUMAN	IKBKG	12	negative	PMID: 15371500
TCPZ_HUMAN	CCT6A	15	positive	PMID: 16980958	CH60_HUMAN	HSPD1	17	not known
AMFR_HUMAN	AMFR	13	positive	PMID: 20126661	SYVN1_HUMAN	SYVN1	2	positive	PMID: 17141218
MLP3B_HUMAN	MAP1LC3B	1	positive	PMID: 29046994	MLP3A_HUMAN	MAP1LC3A	7	not known
UBQL2_HUMAN	UBQLN2	5	positive	PMID: 32681165	UBQL1_HUMAN	UBQLN1	17	positive	PMID: 32681165,PMID: 16461334
