# Supplementary figures and images for: Analysis of Huntington’s Disease Modifiers Using the Hyperbolic Mapping of the Protein Interaction Network
Source: MDPI journal article supplement (doi:10.3390/ijms23105853), 2022-05-23

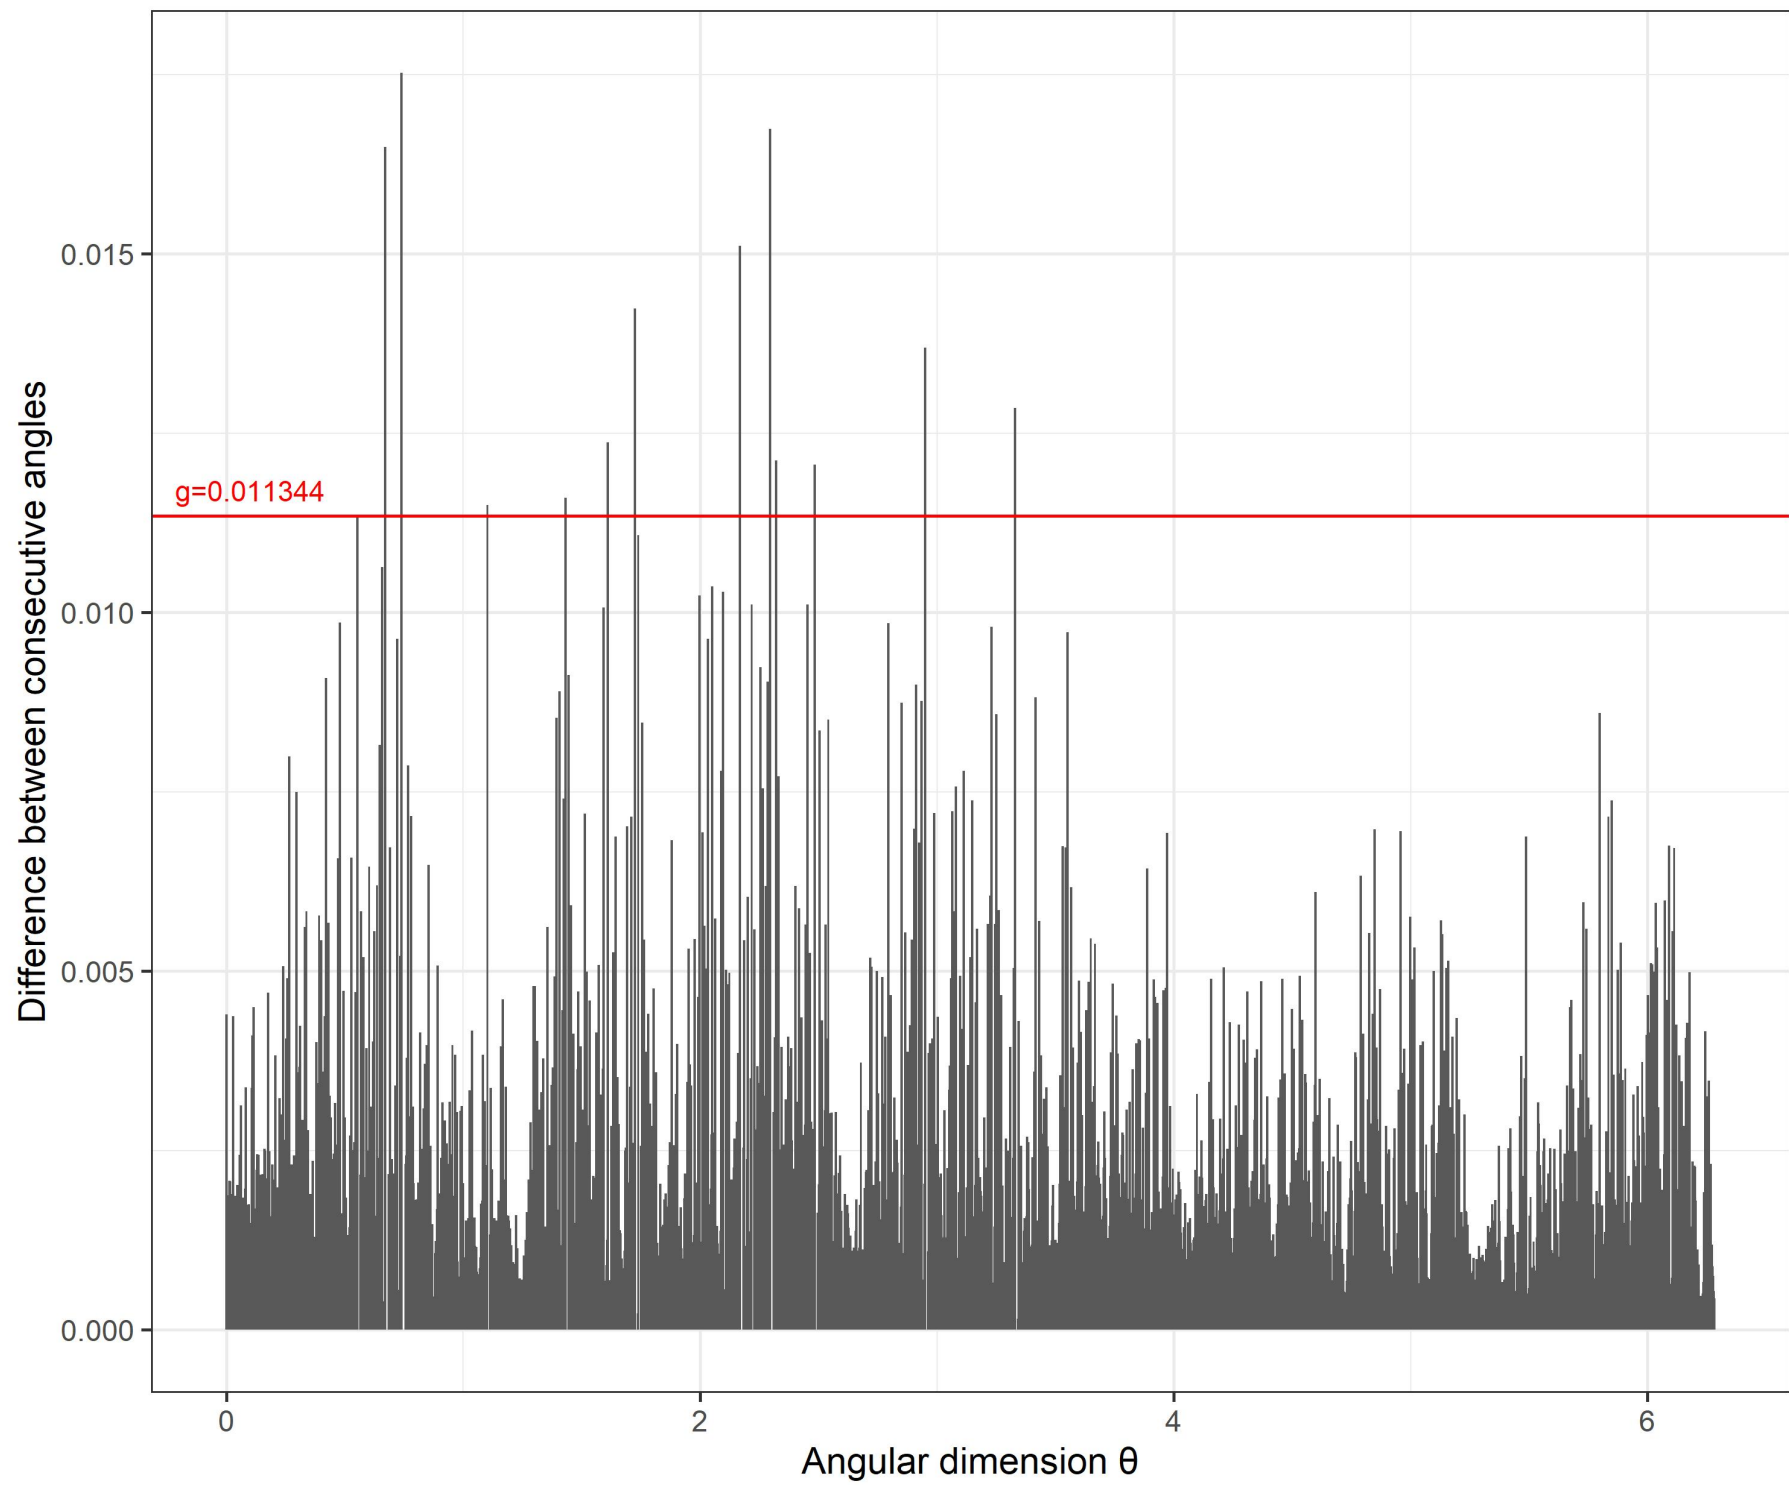

Supplement: s1 [file s1]

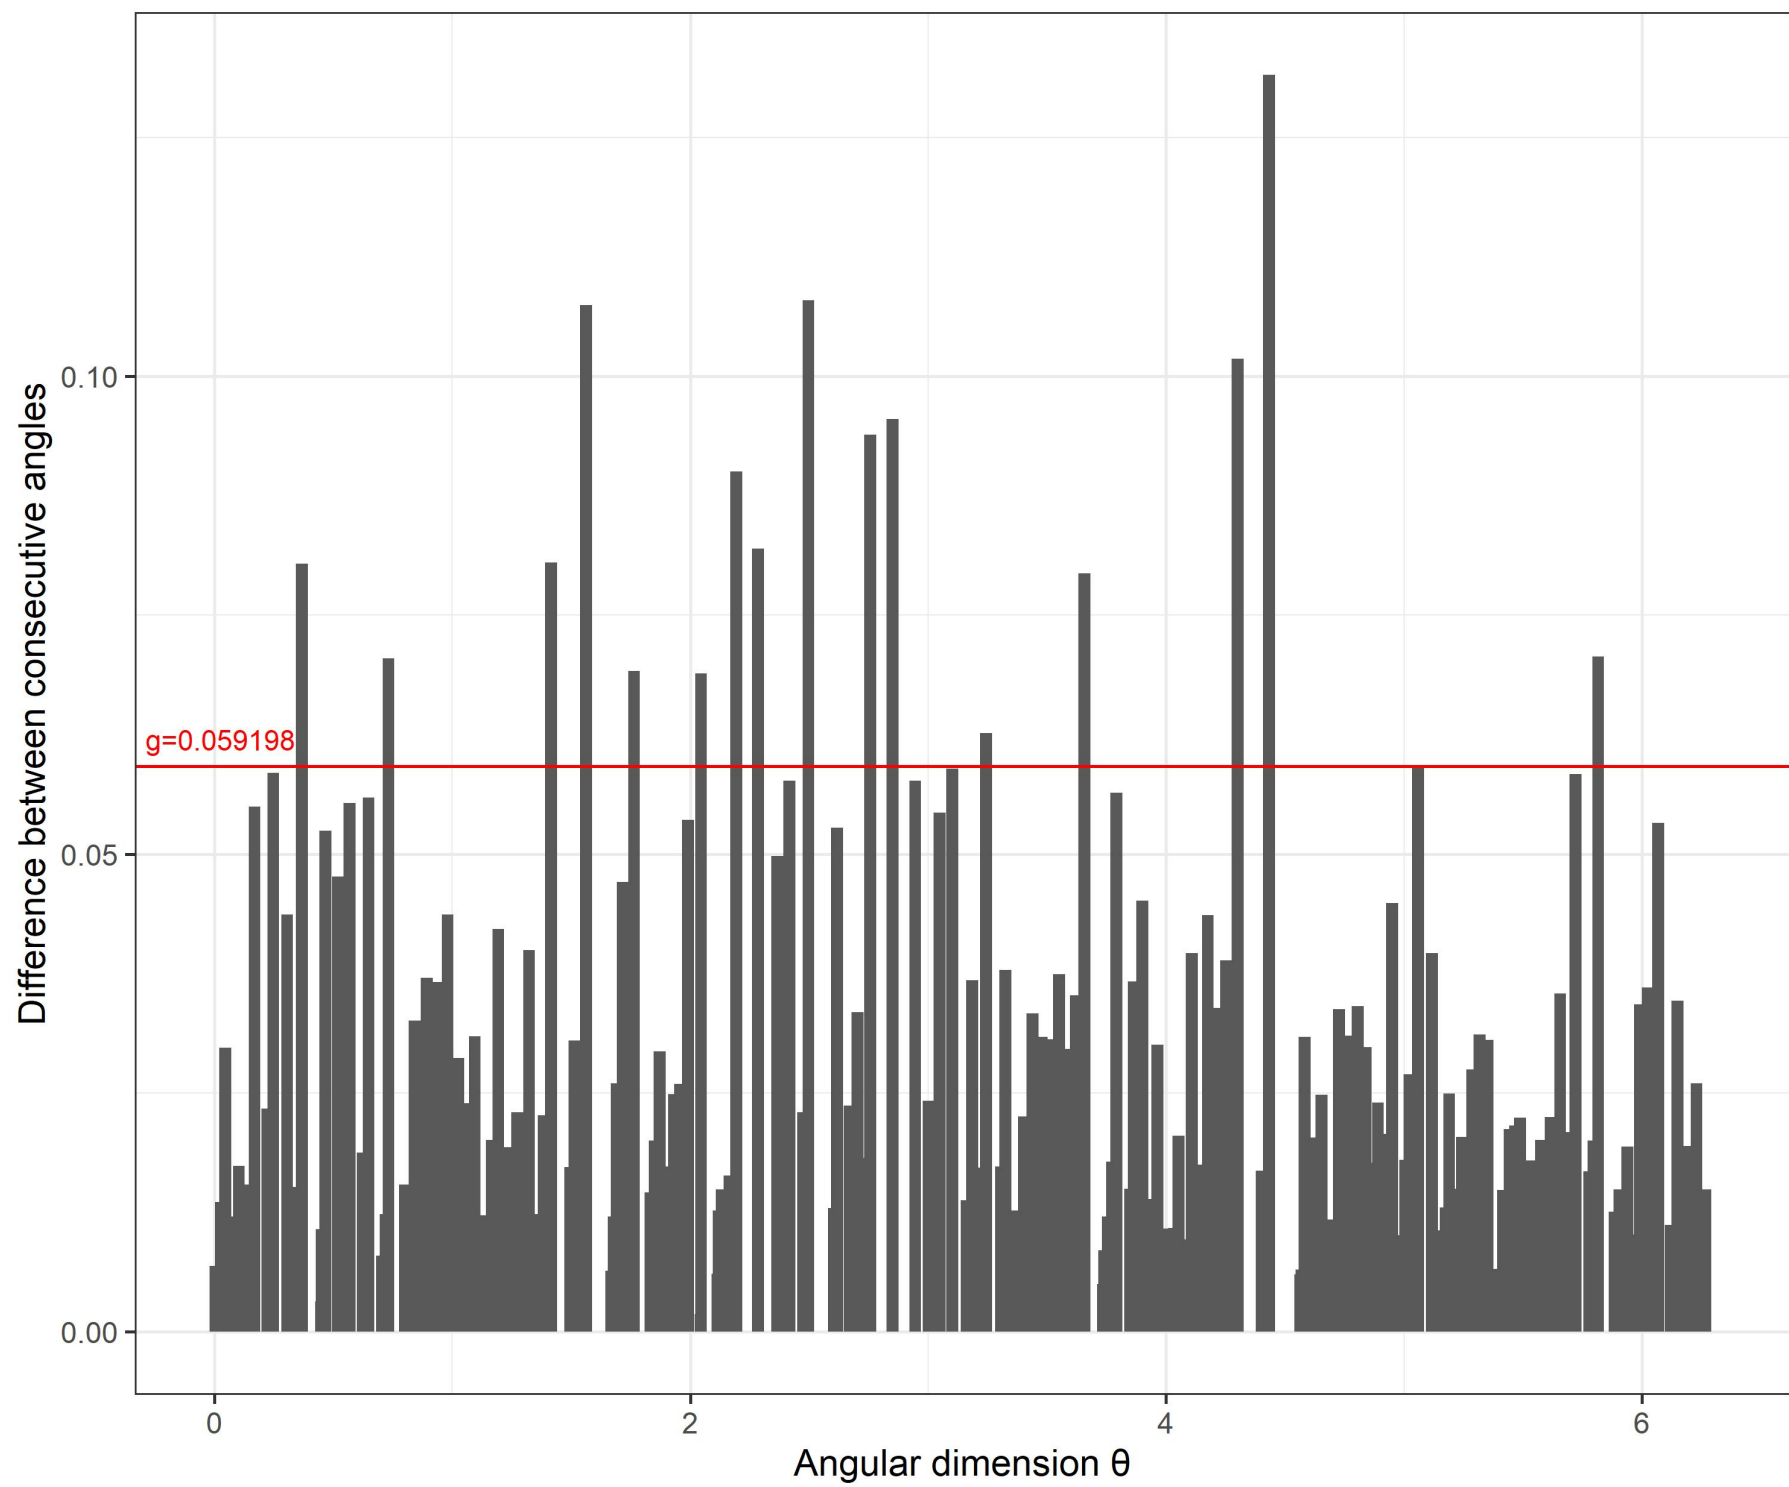

Supplement: s1 [file s1]
